# Supplementary material for: Electrochemical hydrogenation of nitrogen to ammonia under ambient conditions in a suspended dual-catalyst system
Source: Royal Society of Chemistry journal article supplement (doi:10.1039/d4gc05276e), 2025-01-01
Supplement: d4gc05276e1.pdf [file d4gc05276e1.pdf]

*Supporting information for*

## **Electrochemical hydrogenation of nitrogen to ammonia at ambient conditions in a suspended dual-catalyst system**

Yue Zhang<sup>a</sup>, Wei Sun<sup>a\*</sup>, Rui-shuang Zhang<sup>a</sup>, Yan Feng<sup>a</sup>, Bin Dai<sup>a\*</sup>, Jichang Liu<sup>b</sup>

a: School of Chemistry and Chemical Engineering, Shihezi University, Shihezi, PR China.

b: State Key Laboratory of Chemical Engineering, East China University of Science and Technology, Shanghai, PR China.

\*Corresponding author: Wei Sun, Email: [weisun@shzu.edu.cn](mailto:weisun@shzu.edu.cn) and [18741354180@163.com](mailto:18741354180@163.com).

Bin Dai, Email: [db\\_tea@shzu.edu.cn](mailto:db_tea@shzu.edu.cn).

### **Contents**

**Supplementary Tables (Table.S1~3)**

**Supplementary Figures (Figure 1~27)**

**Supplementary Text**

- 1. Structure characterizations of prepared Ru/TiO<sub>2</sub> catalyst*
- 2. How the alcohols added in SiW<sub>12</sub> solution affect the ammonia production*
- 3. How the alcohols affect the ammonia determination by Nessler's reagents*
- 4. Comparison of ammonia determination by <sup>1</sup>H-NMR or ion chromatography method with the colorimetric method of Nessler's reagents*
- 5. Interaction determination between SiW<sub>12</sub> and catalyst Ru/TiO<sub>2</sub>*
- 6. Comparison of conventional electrolysis with our proposed routes*

**Appendix**

- 1. Comparison of ammonia synthesis at constant current and constant potential*
- 2. Experimental details and errors summarized in Table.A1*

**References**

**Supplementary Table.S1** Various electrochemical systems for ammonia synthesis from N<sub>2</sub> and H<sub>2</sub>O at ambient conditions in reported literatures and our work

| Electrolyte                          | Catalysts<br>(Metal wt%)                                    | Current density<br>mA/cm <sup>2</sup> | NH <sub>3</sub> yield rate<br>ug/h/g-cat | TOF<br>h <sup>-1</sup> | FE,%  | Detection<br>methods   | Ref.      |
|--------------------------------------|-------------------------------------------------------------|---------------------------------------|------------------------------------------|------------------------|-------|------------------------|-----------|
| 0.5M NaOH                            | Ru SAs/g-C <sub>3</sub> N <sub>4</sub><br>(0.6wt%)          | <0.1                                  | 2300                                     | 2.28                   | 8.3   | Nessler's reagent      | [1]       |
| 0.1M HCl                             | Ru/NC<br>(0.1wt%)                                           | ~2                                    | 3665                                     | 21.77                  | 8.5   | Indophenol blue method | [2]       |
| 0.1M HCl                             | Ru@ZrO <sub>2</sub> /NC<br>(0.1wt%)                         | ~2                                    | 1500                                     | 8.91                   | 15    | Indophenol blue method | [2]       |
| 0.05M H <sub>2</sub> SO <sub>4</sub> | Ru SAs/N-C<br>(0.18wt%)                                     | ~0.5                                  | 120900                                   | 399                    | 29.6  | Indophenol blue method | [3]       |
| 0.05M H <sub>2</sub> SO <sub>4</sub> | Ru NPs/N-C<br>(2.64wt%)                                     | ~0.5                                  | 62500                                    | 14.07                  | 14.1  | Indophenol blue method | [3]       |
| 0.5M K <sub>2</sub> SO <sub>4</sub>  | Ru SAs/Mo <sub>2</sub> CTx<br>(1.41wt%)                     | ~0.1                                  | 40800                                    | 17.19                  | 25.77 | Indophenol blue method | [4]       |
| 0.1M HCl                             | RuP <sub>2</sub> /rGO<br>(33.54wt%)                         | ~0.2                                  | 32300                                    | 0.57                   | 13.04 | Indophenol blue method | [5]       |
| 5mM H <sub>2</sub> SO <sub>4</sub>   | Au <sub>1</sub> /C <sub>3</sub> N <sub>4</sub><br>(0.15wt%) | ~0.04                                 | 1947.8                                   | 15.05                  | 11.1  | Indophenol blue method | [6]       |
| 5mM H <sub>2</sub> SO <sub>4</sub>   | Au NPs/C <sub>3</sub> N <sub>4</sub><br>(3.4wt%)            | ~0.04                                 | 1972                                     | 0.67                   | 6     | Indophenol blue method | [6]       |
| 0.1M Na <sub>2</sub> SO <sub>4</sub> | FePc/C<br>(0.73wt%)                                         | ~0.5                                  | 10250                                    | 4.63                   | 10.5  | Indophenol blue method | [7]       |
| 0.1M KOH                             | Fe-N/C-CNTs<br>(0.5wt%)                                     | ~0.8                                  | 34830                                    | 22.95                  | 9.28  | Nessler's reagent      | [8]       |
| 0.1M KOH                             | FeSA-N-C<br>(1.09wt%)                                       | <0.05                                 | 7480                                     | 2.26                   | 56.55 | Indophenol blue method | [9]       |
| 0.1M HCl                             | Au/CeOx-RGO<br>(1.31wt%)                                    | <0.1                                  | 8300                                     | 7.34                   | 10.1  | Indophenol blue method | [10]      |
| 0.1M HCl                             | Au/TiO <sub>2</sub><br>(1.542wt%)                           | ~0.4                                  | 21400                                    | 16.08                  | 8.11  | Indophenol blue method | [11]      |
| 0.5M Li <sub>2</sub> SO <sub>4</sub> | PEBCD/C<br>(----)                                           | ~1                                    | 2010                                     | ----                   | 1.71  | Nessler's reagent      | [12]      |
| 0.05M H <sub>2</sub> SO <sub>4</sub> | NPC<br>(----)                                               | ~4.5                                  | 23800                                    | ----                   | 1.42  | Nessler's reagent      | [13]      |
| 0.5mM SiW <sub>12</sub>              | Ru/TiO <sub>2</sub><br>(0.28wt%)                            | 0.1                                   | 192.2                                    | 0.41                   | 42.9  | Nessler's reagent      | This work |
|                                      |                                                             | 1                                     | 265.2                                    | 0.56                   | 5.92  |                        |           |
|                                      |                                                             | 10                                    | 2446.1                                   | 5.19                   | 5.46  |                        |           |
|                                      |                                                             | 100                                   | 16691.3                                  | 35.42                  | 3.73  |                        |           |

FE is the faradaic efficient.

**Supplementary Table.S2** Various electrochemical systems for ammonia synthesis under ambient pressure and different temperatures in reported literatures and our work

| T, °C   | Electrolyte                                                                              | Cathode                                                     | Reactants                                | Current density<br>mA/cm <sup>2</sup> | NH <sub>3</sub> yield rate<br>ug/h/cm <sup>2</sup> | FE,%                         | Detection<br>methods         | Ref.         |
|---------|------------------------------------------------------------------------------------------|-------------------------------------------------------------|------------------------------------------|---------------------------------------|----------------------------------------------------|------------------------------|------------------------------|--------------|
| 550     | BaCe <sub>0.2</sub> Zr <sub>0.7</sub> Y <sub>0.1</sub> O <sub>2.9</sub>                  | Ni-BZCY72                                                   | H <sub>2</sub> -N <sub>2</sub>           | 12.5                                  | 175.03                                             | 6.2                          | Cavity Ringdown Spectroscopy | [14]         |
| 550     | La <sub>0.9</sub> Sr <sub>0.1</sub> Ga <sub>0.8</sub> Mg <sub>0.2</sub> O <sub>3-α</sub> | Ag-Pd                                                       | H <sub>2</sub> -N <sub>2</sub>           | 2.1                                   | 145.04                                             | 70                           | Nessler's reagent            | [15]         |
| 550     | BaZr <sub>0.8</sub> Y <sub>0.2</sub> O <sub>3-δ</sub>                                    | Ag                                                          | H <sub>2</sub> O-N <sub>2</sub>          | 4.5                                   | 3.00                                               | 0.46                         | Indophenol blue method       | [16]         |
| 550     | BaZr <sub>0.8</sub> Y <sub>0.2</sub> O <sub>3-δ</sub>                                    | LCSF                                                        | H <sub>2</sub> O-N <sub>2</sub>          | 5.5                                   | 5.20                                               | 0.33                         | Indophenol blue method       | [16]         |
| 500     | BaCe <sub>0.9</sub> Y <sub>0.1</sub> O <sub>3-δ</sub>                                    | Ru/LSTR                                                     | H <sub>2</sub> -N <sub>2</sub>           | 0.45                                  | 0.31                                               | 2                            | Liquid chromatography        | [17]         |
| 500     | BaCe <sub>0.9</sub> Y <sub>0.1</sub> O <sub>3-δ</sub>                                    | Ag-Pd                                                       | H <sub>2</sub> -N <sub>2</sub>           | 0.8                                   | 1.84                                               | <1                           | Liquid chromatography        | [17]         |
| 500     | BaCe <sub>0.85</sub> Y <sub>0.15</sub> O <sub>3-α</sub>                                  | Ag-Pd                                                       | H <sub>2</sub> -N <sub>2</sub>           | 1.0                                   | 128.52                                             | 60                           | Spectrophotometry            | [18]         |
| 450     | SDC-ternary carbonate                                                                    | (LSFCu)<br>-SDC                                             | H <sub>2</sub> -N <sub>2</sub>           | 55                                    | 329.87                                             | 7.5                          | Nessler's reagent            | [19]         |
| 450     | LiAlO <sub>2</sub> -(Li/Na/K) <sub>2</sub> CO <sub>3</sub>                               | Co <sub>3</sub> Mo <sub>3</sub> N-<br>Ag                    | H <sub>2</sub> -N <sub>2</sub>           | 3.21                                  | 20.01                                              | 3.83                         | Nessler's reagent            | [20]         |
| 400     | Carbonate-LiAlO <sub>2</sub>                                                             | CoFe <sub>2</sub> O <sub>4</sub> -<br>Ag                    | H <sub>2</sub> -N <sub>2</sub>           | 3.0                                   | 14.20                                              | 2.30                         | Nessler's reagent            | [21]         |
| 400     | Ce <sub>0.8</sub> Gd <sub>0.18</sub> Ca <sub>0.02</sub> O <sub>2-δ</sub>                 | (LSFCu)-<br>CGDC                                            | H <sub>2</sub> O<br>-N <sub>2</sub> /Air | 14.5                                  | 3.06                                               | 0.39                         | Ammonia ISE analysis         | [22]         |
| 300     | LiCl, KCl, CsCl<br>(0.5% Li <sub>3</sub> N)                                              | Porous Ni<br>Plate                                          | H <sub>2</sub> O-N <sub>2</sub>          | 25                                    | 354.96                                             | 80                           | IR spectroscopy              | [23]         |
| 300     | LiCl, KCl, CsCl<br>(0.5% Li <sub>3</sub> N)                                              | Porous Ni<br>Plate                                          | H <sub>2</sub> O-N <sub>2</sub>          | 23                                    | 1224.0                                             | 23                           | IR spectroscopy              | [24]         |
| 200     | NaOH/KOH<br>Nano-Fe <sub>2</sub> O <sub>3</sub>                                          | Ni                                                          | H <sub>2</sub> O-N <sub>2</sub>          | 200                                   | 612.0                                              | 35                           | UV/vis,<br>ISE, Test strips  | [25]         |
| 200     | Na <sub>0.5</sub> K <sub>0.5</sub> OH<br>Nano-Fe <sub>2</sub> O <sub>3</sub>             | Monel<br>(Ni-Cu)                                            | H <sub>2</sub> O-N <sub>2</sub>          | 20                                    | 991.44                                             | 76                           | UV/vis,<br>ISE, Test strips  | [26]         |
| 90      | Nafion                                                                                   | Ru                                                          | H <sub>2</sub> O-N <sub>2</sub>          | 2.6                                   | 1.30                                               | 0.92                         | Ion<br>Chromatography        | [27]         |
| 80      | Nafion                                                                                   | Pt                                                          | H <sub>2</sub> O -Air                    | 10                                    | 57.34                                              | 0.83                         | Nessler's<br>reagent         | [28]         |
| Ambient | 0.5mM SiW <sub>12</sub>                                                                  | Graphite rod<br>(with<br>suspended<br>Ru/TiO <sub>2</sub> ) | H <sub>2</sub> O-N <sub>2</sub>          | 0.1<br>1<br>10<br>100                 | 192.2<br>265.2<br>2446.1<br>16691.3                | 42.9<br>5.92<br>5.46<br>3.73 | Nessler's<br>Reagent         | This<br>work |

**Supplementary Table.S3** Comparison of ammonia NH<sub>3</sub> generation rate in literatures  
(hydrogenation of nitrogen N<sub>2</sub> with hydrogen H<sub>2</sub>: N<sub>2</sub>+ H<sub>2</sub>⇌NH<sub>3</sub>) with this study.

| No. | Catalysts                             | Metal<br>(wt%) | Tem./Pre.<br>(H <sub>2</sub> /N <sub>2</sub> ) | <sup>a</sup> NH <sub>3</sub> yield<br>umol/g/h | Ea<br>kJ/mol | <sup>b</sup> NH <sub>3</sub> yield(25 °C)<br>umol/g/h | <sup>c</sup> TOF(25 °C)<br>s <sup>-1</sup> | Ref  |
|-----|---------------------------------------|----------------|------------------------------------------------|------------------------------------------------|--------------|-------------------------------------------------------|--------------------------------------------|------|
| 1   | Ru/C12A7:e <sup>-</sup>               | 1.2(Ru)        | 360 °C, 1atm<br>(3:1)                          | 1820                                           | 49           | 0.052                                                 | 1.21 × 10 <sup>-7</sup>                    | [29] |
| 2   | Ru/C12A7:O <sup>2-</sup>              | 1.2(Ru)        | 360 °C, 1atm<br>(3:1)                          | 250                                            | 104          | 5.62 × 10 <sup>-8</sup>                               | 1.31 × 10 <sup>-13</sup>                   | [29] |
| 3   | Ru/CaO•Al <sub>2</sub> O <sub>3</sub> | 1.2(Ru)        | 360 °C, 1atm<br>(3:1)                          | 150                                            | 118          | 1.70 × 10 <sup>-9</sup>                               | 3.97 × 10 <sup>-15</sup>                   | [29] |
| 4   | Ru-Cs/MgO                             | 6(Ru)          | 360 °C, 1atm<br>(3:1)                          | 1720                                           | 99           | 1.13 × 10 <sup>-6</sup>                               | 5.26 × 10 <sup>-13</sup>                   | [29] |
| 5   | Ru/C12A7:H <sup>-</sup>               | 1(Ru)          | 360 °C, 1atm<br>(3:1)                          | 90                                             | 154          | 4.66 × 10 <sup>-13</sup>                              | 1.31 × 10 <sup>-18</sup>                   | [29] |
| 6   | Ru/γ-Al <sub>2</sub> O <sub>3</sub>   | 6(Ru)          | 400 °C, 1atm<br>(3:1)                          | 51                                             | 64.4         | 2.61 × 10 <sup>-5</sup>                               | 1.22 × 10 <sup>-11</sup>                   | [30] |
| 7   | Ru/CaO                                | 1.5(Ru)        | 400 °C, 1atm<br>(3:1)                          | 158                                            | 120.1        | 2.94 × 10 <sup>-10</sup>                              | 5.50 × 10 <sup>-16</sup>                   | [30] |
| 8   | Ba-Ru/AC                              | 1(Ru)          | 400 °C, 1atm<br>(3:1)                          | 148                                            | 88.8         | 3.14 × 10 <sup>-7</sup>                               | 8.81 × 10 <sup>-13</sup>                   | [30] |
| 9   | Ba-Ru/AC                              | 9.1(Ru)        | 400 °C, 1atm<br>(3:1)                          | 2228                                           | 72.5         | 1.85 × 10 <sup>-4</sup>                               | 5.70 × 10 <sup>-11</sup>                   | [30] |
| 10  | Cs-Ru/MgO                             | 1(Ru)          | 400 °C, 1atm<br>(3:1)                          | 2264                                           | 85.8         | 9.43 × 10 <sup>-6</sup>                               | 2.65 × 10 <sup>-11</sup>                   | [30] |
| 11  | Cs-Ru/MgO                             | 6(Ru)          | 400 °C, 1atm<br>(3:1)                          | 3353                                           | 73           | 2.48 × 10 <sup>-4</sup>                               | 1.16 × 10 <sup>-10</sup>                   | [30] |
| 12  | Ru/C12A7:O <sup>2-</sup>              | 1.2(Ru)        | 400 °C, 1atm<br>(3:1)                          | 546                                            | 104.6        | 3.32 × 10 <sup>-8</sup>                               | 7.75 × 10 <sup>-14</sup>                   | [30] |
| 13  | Ru/C12A7:e <sup>-</sup>               | 0.1(Ru)        | 400 °C, 1atm<br>(3:1)                          | 715                                            | 53.6         | 0.0042                                                | 1.17 × 10 <sup>-7</sup>                    | [30] |
| 14  | Ru/C12A7:e <sup>-</sup>               | 0.3(Ru)        | 400 °C, 1atm<br>(3:1)                          | 1027                                           | 40           | 0.13                                                  | 1.19 × 10 <sup>-6</sup>                    | [30] |
| 15  | Ru/C12A7:e <sup>-</sup>               | 1.2(Ru)        | 400 °C, 1atm<br>(3:1)                          | 2757                                           | 49.1         | 0.044                                                 | 1.03 × 10 <sup>-7</sup>                    | [30] |
| 16  | Ru/C12A7:e <sup>-</sup>               | 4(Ru)          | 400 °C, 1atm<br>(3:1)                          | 2122                                           | 56           | 0.0072                                                | 5.05 × 10 <sup>-9</sup>                    | [30] |
| 17  | Ru/C12A7:e <sup>-</sup> (HT)          | 2(Ru)          | 340 °C, 1atm<br>(3:1)                          | 2290                                           | 53           | 0.039                                                 | 5.41 × 10 <sup>-8</sup>                    | [31] |
| 18  | Ru/C12A7:e <sup>-</sup> (SP)          | 2(Ru)          | 340 °C, 1atm<br>(3:1)                          | 1180                                           | 49           | 0.046                                                 | 6.38 × 10 <sup>-8</sup>                    | [31] |
| 19  | Ru/Ca <sub>2</sub> N:e <sup>-</sup>   | 1.8(Ru)        | 300 °C, 1atm<br>(3:1)                          | 1674                                           | 60           | 0.015                                                 | 2.34 × 10 <sup>-8</sup>                    | [32] |

|    |                                         |         |                       |       |       |                        |                        |      |
|----|-----------------------------------------|---------|-----------------------|-------|-------|------------------------|------------------------|------|
| 20 | Ru/CaNH                                 | 1.8(Ru) | 300 °C, 1atm<br>(3:1) | 53    | 110   | $2.95 \times 10^{-8}$  | $4.60 \times 10^{-14}$ | [32] |
| 21 | Ru/C12A7:e <sup>-</sup>                 | 1.8(Ru) | 300 °C, 1atm<br>(3:1) | 745   | 51    | 0.038                  | $5.95 \times 10^{-8}$  | [32] |
| 22 | Ru/CaH <sub>2</sub>                     | 2(Ru)   | 300 °C, 1atm<br>(3:1) | 2549  | 71    | 0.0027                 | $3.80 \times 10^{-9}$  | [32] |
| 23 | Ru-Cs/MgO                               | 2(Ru)   | 300 °C, 1atm<br>(3:1) | 697   | 120   | $5.60 \times 10^{-8}$  | $7.85 \times 10^{-14}$ | [32] |
| 24 | Ru/BaO-CaH <sub>2</sub>                 | 10(Ru)  | 340 °C, 1atm<br>(3:1) | 10500 | 41    | 2.13                   | $5.97 \times 10^{-7}$  | [33] |
| 25 | Ru/CaH <sub>2</sub>                     | 10(Ru)  | 340 °C, 1atm<br>(3:1) | 7400  | 68    | 0.0055                 | $1.56 \times 10^{-9}$  | [33] |
| 26 | Ru/Ba-Ca(NH <sub>2</sub> ) <sub>2</sub> | 10(Ru)  | 340 °C, 1atm<br>(3:1) | 12400 | 44    | 1.35                   | $3.79 \times 10^{-7}$  | [33] |
| 27 | Ru/Y <sub>5</sub> Si <sub>3</sub>       | 2(Ru)   | 400 °C, 1atm<br>(3:1) | 800   | 48    | 0.016                  | $2.30 \times 10^{-8}$  | [34] |
| 28 | Ru/Y <sub>5</sub> Si <sub>3</sub>       | 5(Ru)   | 400 °C, 1atm<br>(3:1) | 1400  | 50    | 0.018                  | $1.03 \times 10^{-8}$  | [34] |
| 29 | Ru/Y <sub>5</sub> Si <sub>3</sub>       | 7.8(Ru) | 400 °C, 1atm<br>(3:1) | 1900  | 52    | 0.016                  | $5.70 \times 10^{-9}$  | [34] |
| 30 | Ru/LaScSi                               | 1.8(Ru) | 400 °C, 1atm<br>(3:1) | 2800  | 52    | 0.023                  | $3.64 \times 10^{-8}$  | [35] |
| 31 | Ru/LaScSi                               | 4.4(Ru) | 400 °C, 1atm<br>(3:1) | 3000  | 52    | 0.025                  | $1.59 \times 10^{-8}$  | [35] |
| 32 | Ru/LaScSi                               | 8.3(Ru) | 400 °C, 1atm<br>(3:1) | 3400  | 49    | 0.056                  | $1.88 \times 10^{-8}$  | [35] |
| 33 | Co/C12A7:e <sup>-</sup>                 | 2.6(Co) | 400 °C, 1atm<br>(3:1) | 1764  | 49.5  | 0.026                  | $1.63 \times 10^{-8}$  | [36] |
| 34 | Co/C12A7:O <sub>2</sub>                 | 2.9(Co) | 400 °C, 1atm<br>(3:1) | 48    | 112.7 | $4.72 \times 10^{-10}$ | $2.66 \times 10^{-16}$ | [36] |
| 35 | Ba-Co/AC                                | 10(Co)  | 400 °C, 1atm<br>(3:1) | 104   | 98.3  | $2.60 \times 10^{-8}$  | $4.27 \times 10^{-15}$ | [36] |
| 36 | Cs-Co/MgO                               | 6(Co)   | 400 °C, 1atm<br>(3:1) | 149   | 108.9 | $3.44 \times 10^{-9}$  | $9.40 \times 10^{-16}$ | [36] |
| 37 | Co <sub>3</sub> Mo <sub>3</sub> N       | ---     | 400 °C, 1atm<br>(3:1) | 652   | 56    | 0.0022                 | ---                    | [37] |
| 38 | Ni-Mo-N                                 | ---     | 400 °C, 1atm<br>(3:1) | 275   | 53    | 0.0018                 | ---                    | [37] |
| 39 | Fe-Mo-N                                 | ---     | 400 °C, 1atm<br>(3:1) | 143   | 47    | 0.0037                 | ---                    | [37] |
| 40 | Mo <sub>2</sub> N                       | ---     | 400 °C, 1atm<br>(3:1) | 68    | 52    | $5.67 \times 10^{-4}$  | ---                    | [37] |

|    |                                        |          |                        |       |      |                        |                        |           |
|----|----------------------------------------|----------|------------------------|-------|------|------------------------|------------------------|-----------|
| 41 | Ru/CaFH                                | 12(Ru)   | 50 °C, 1atm<br>(3:1)   | 50    | 20   | 26.77                  | $6.26 \times 10^{-6}$  | [38]      |
| 42 | Ru/MgX                                 | 2.21(Ru) | 400 °C, 20atm<br>(3:1) | 2804  | 147  | $1.23 \times 10^{-11}$ | $1.56 \times 10^{-17}$ | [39]      |
| 43 | Ru/CsX                                 | 1.82(Ru) | 400 °C, 20atm<br>(3:1) | 993   | 82   | $9.72 \times 10^{-6}$  | $1.50 \times 10^{-11}$ | [39]      |
| 44 | Ru/KX-1                                | 2.16(Ru) | 400 °C, 20atm<br>(3:1) | 993   | 124  | $7.68 \times 10^{-10}$ | $9.98 \times 10^{-16}$ | [39]      |
| 45 | Ru/BaX-1                               | 2.02(Ru) | 400 °C, 20atm<br>(3:1) | 1980  | 173  | $2.51 \times 10^{-14}$ | $3.48 \times 10^{-20}$ | [39]      |
| 46 | Co-Ba/C                                | ---      | 400 °C, 10atm<br>(3:1) | 22320 | 102  | $2.43 \times 10^{-6}$  | ---                    | [40]      |
| 47 | Co-Sr/C                                | ---      | 400 °C, 10atm<br>(3:1) | 5040  | 110  | $9.09 \times 10^{-8}$  | ---                    | [40]      |
| 48 | Fe(KM1)                                | ---      | 400 °C, 10atm<br>(3:1) | 37800 | 70   | 0.0055                 | ---                    | [40]      |
| 49 | Co/C                                   | ---      | 400 °C, 10atm<br>(3:1) | 79.2  | 149  | $2.22 \times 10^{-13}$ | ---                    | [40]      |
| 50 | Fe/C                                   | ---      | 400 °C, 10atm<br>(3:1) | 7560  | 143  | $8.15 \times 10^{-11}$ | ---                    | [40]      |
| 51 | Fe-LiH                                 | ---      | 300 °C, 10atm<br>(3:1) | 4500  | 46.5 | 0.55                   | ---                    | [41]      |
| 52 | Mn-LiH                                 | ---      | 300 °C, 10atm<br>(3:1) | 3000  | 50.6 | 0.17                   | ---                    | [41]      |
| 53 | Co-LiH                                 | ---      | 300 °C, 10atm<br>(3:1) | 4800  | 52.1 | 0.20                   | ---                    | [41]      |
| 54 | Cr-LiH                                 | ---      | 300 °C, 10atm<br>(3:1) | 3500  | 63.6 | 0.016                  | ---                    | [41]      |
| 55 | SiW <sub>12</sub> -Ru/TiO <sub>2</sub> | 0.28(Ru) | 25 °C, 1atm<br>(---)   | 981.8 | ---  | ---                    | $9.84 \times 10^{-3}$  | This work |

*a*: Ammonia yield was experimentally determined at the given temperature and pressure ( $H_2/N_2$ ), where  $H_2/N_2$  is the volume ratio of hydrogen  $H_2$  to nitrogen  $N_2$  in feedstock.

*b*: Ammonia yield at 25 °C was extrapolated from the experimentally determined ammonia yield and activation energy  $E_a$ .

*c*: TOF was calculated from the ammonia yield divided by the number of metal atoms deposited on the catalysts.

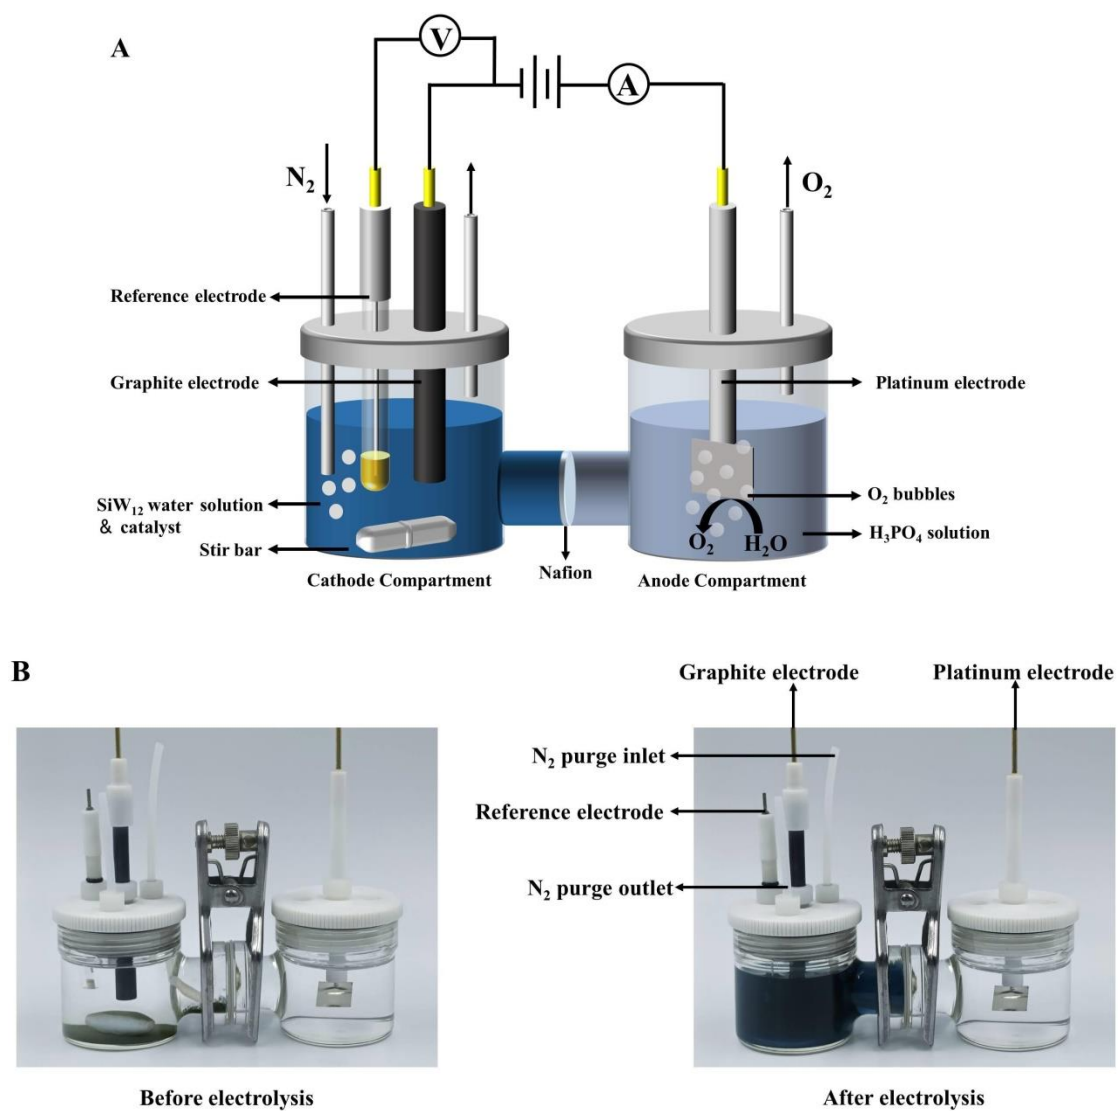

**Supplementary Fig.S1** (A) Schematic illustration for three-electrode system of SiW<sub>12</sub> mediated electro-hydrogenation. (B) Photograph of the experimental setup. The SiW<sub>12</sub> reaction solution in cathode compartment is colorless before electro-reduction, and the color turns to dark blue after electrolysis.

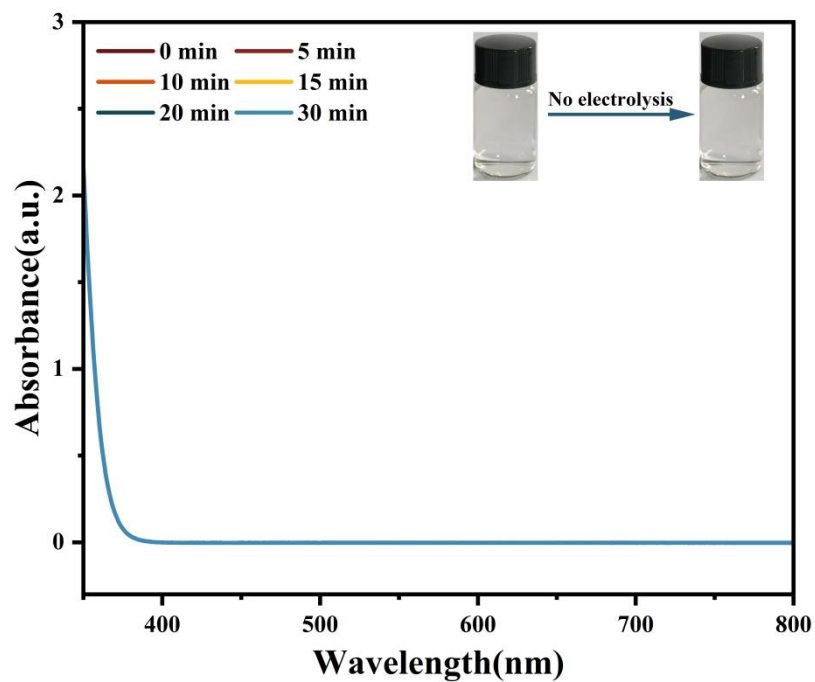

**Supplementary Fig.S2** Chronologically recorded UV-Vis spectra of  $\text{SiW}_{12}$  solution (0.5g  $\text{SiW}_{12}$ , 35mL  $\text{H}_2\text{O}$ ) without electrolysis. The inset photographs demonstrate the  $\text{SiW}_{12}$  solution having no color change without electrolysis.



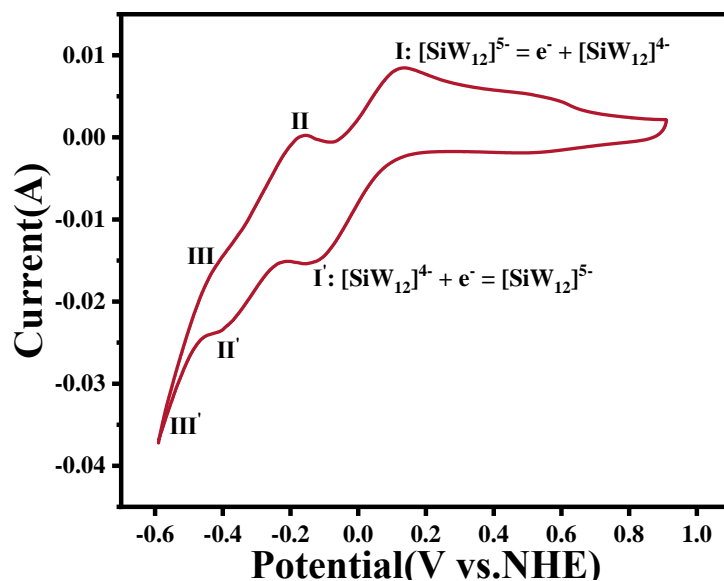

**Supplementary Fig.S3** Cyclic voltammogram of  $\text{SiW}_{12}$  solution (scanning conditions: working electrode: Pt sheet; reference electrode: Ag/AgCl;  $\text{SiW}_{12}$  concentration: 0.05 mol/L; temperature: 20°C; scanning rate: 10 mV/s). The curve of  $\text{SiW}_{12}$  includes three redox waves: the waves centered at around +0.10 V (I), -0.20 V (II) and -0.40 V (III). The first two waves are ascribed to two one-electron reduction processes and the third wave corresponds to a proton associated two-electron reduction[42].

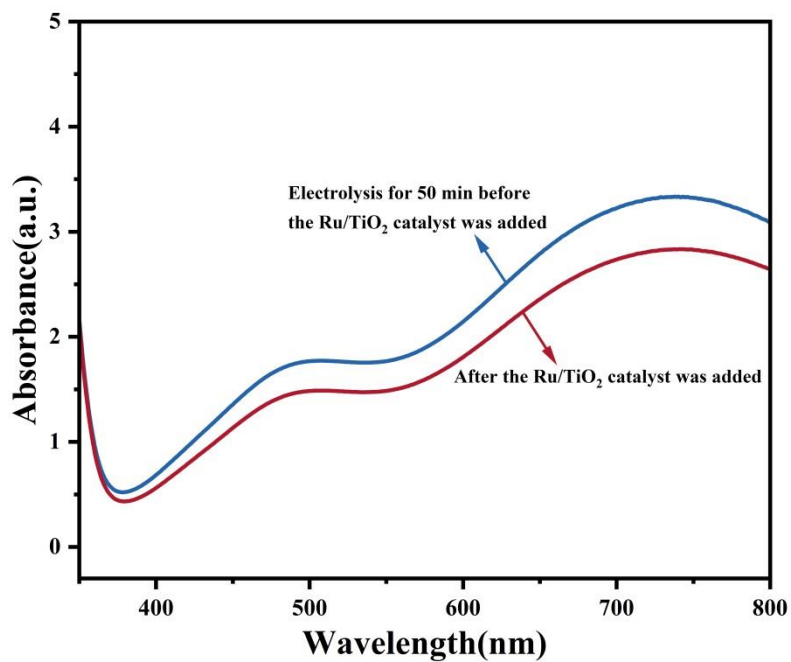

**Supplementary Fig.S4** UV-Vis spectra of SiW<sub>12</sub> solutions before and after adding 0.05g Ru/TiO<sub>2</sub> catalyst particles under a constant electrolysis current density of 100 mA/cm<sup>2</sup>. The UV-Vis spectra were measured by taking out 5mL sample from SiW<sub>12</sub> solutions (0.5g SiW<sub>12</sub>, 35mL H<sub>2</sub>O) which were electrolyzed 50min.

**A**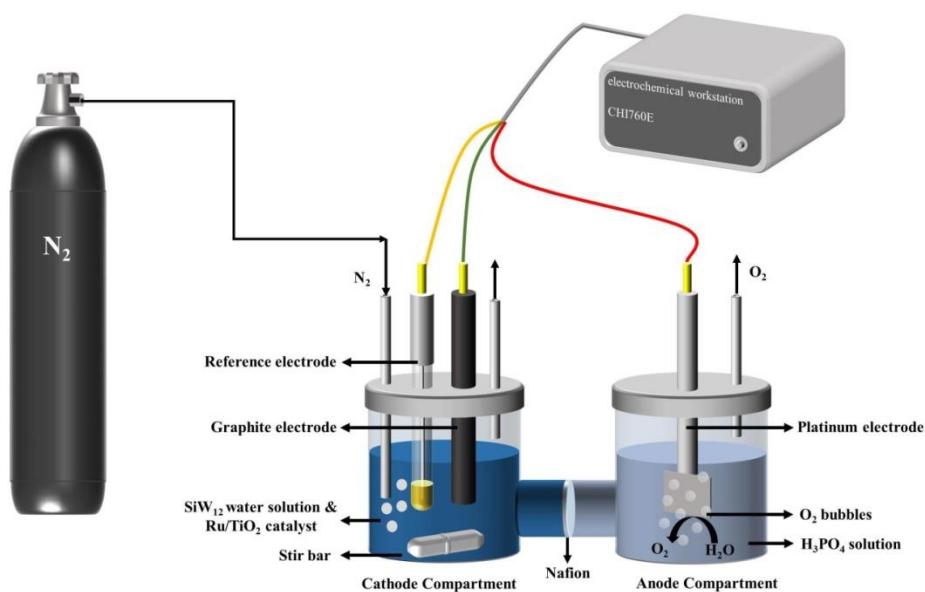**B**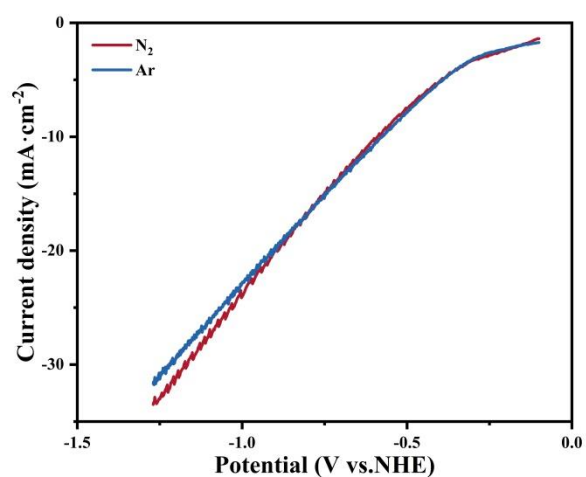

**Supplementary Fig.S5** (A) Illustration of three-electrode electrolysis experimental setup for electrochemical hydrogenation of nitrogen into ammonia. (B) LSV curves in 5mM  $SiW_{12}$  solution suspended with 0.05g  $Ru/TiO_2$  under  $N_2$  and Ar atmospheres. The scan rate is 10mV/s. It can be found that the current density of solution under  $N_2$  atmospheres become larger and larger than that under Ar atmospheres as the reaction proceeds. This could be ascribed to the ammonium ions produced when  $N_2$  gas is bubbled into solution.

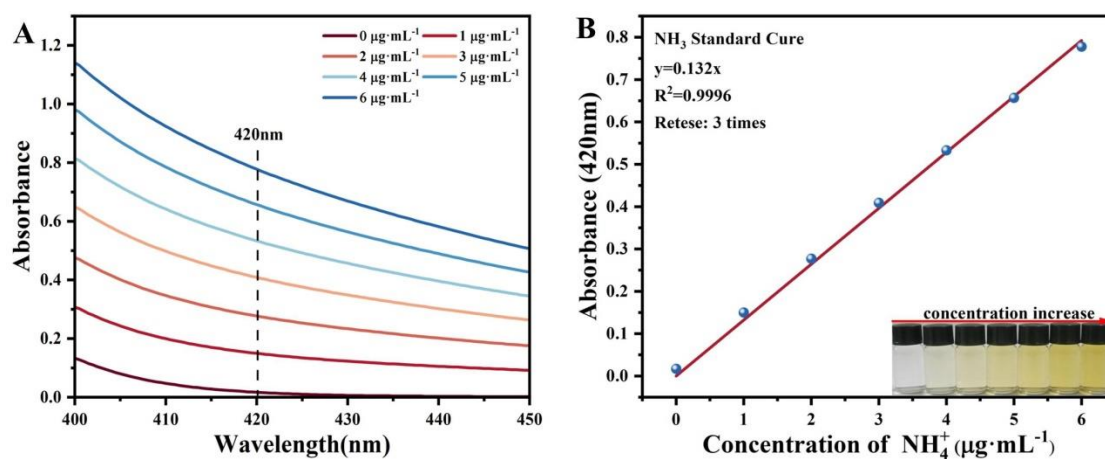

**Supplementary Fig.S6** (A) The UV-Vis absorbance of  $\text{NH}_4\text{Cl}$  aqueous solutions with known  $\text{NH}_4\text{Cl}$  concentrations. (B) Standard curve of the absorbance at 420nm of  $\text{NH}_4\text{Cl}$  aqueous solutions with different  $\text{NH}_4\text{Cl}$  concentrations. The absorbance at 420nm shows a strong linear correlation with the  $\text{NH}_4\text{Cl}$  concentrations, indicating the relationship is in accordance with the Beer-Lambert Law. The Standard curve was measured 3 times.

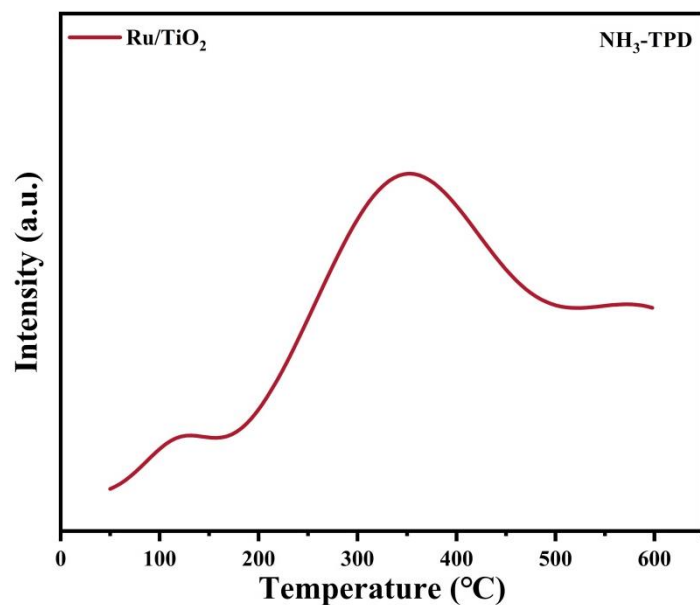

**Supplementary Fig.S7** TPD spectra of NH<sub>3</sub> from Ru/TiO<sub>2</sub> catalyst after exposure to NH<sub>3</sub> at 50 °C for 1h. Ru/TiO<sub>2</sub> catalyst displays three TPD peaks, one centered at ~118 °C, the other two centered at ~346.5 °C and ~593 °C respectively. Moreover, relative low NH<sub>3</sub> response below 100 °C was observed, suggesting the adsorption of NH<sub>3</sub> on Ru/TiO<sub>2</sub> is very strong and most of NH<sub>3</sub> generated on Ru/TiO<sub>2</sub> are difficult to desorb from Ru/TiO<sub>2</sub> catalyst surface at temperature lower than 100 °C.

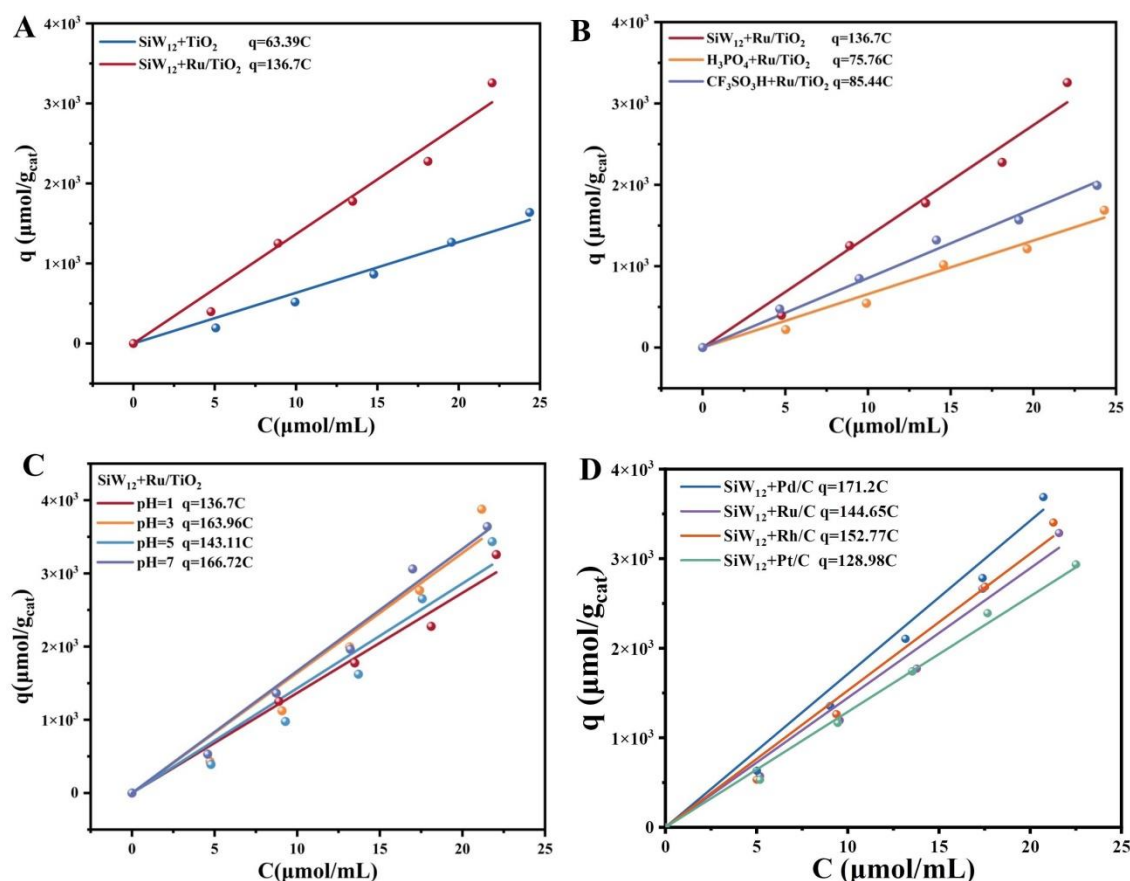

**Supplementary Fig.S8** The adsorption isotherms needed in this work to calculate the amount of adsorbed ammonia during the reaction. (A) The adsorption isotherms were measured at room temperature in SiW<sub>12</sub> solution suspended with Ru/TiO<sub>2</sub> or TiO<sub>2</sub> catalyst particles respectively; (B) The adsorption isotherms were measured at room temperature respectively in SiW<sub>12</sub> solution, CF<sub>3</sub>SO<sub>3</sub>H solution and H<sub>3</sub>PO<sub>4</sub> solution suspended with Ru/TiO<sub>2</sub> catalysts; (C) The adsorption isotherms were measured at room temperature in different pH values of SiW<sub>12</sub> solution suspended with Ru/TiO<sub>2</sub> catalysts; (D) The adsorption isotherms were measured at room temperature in SiW<sub>12</sub> solution suspended with different commercial carbon-supported metal catalysts.

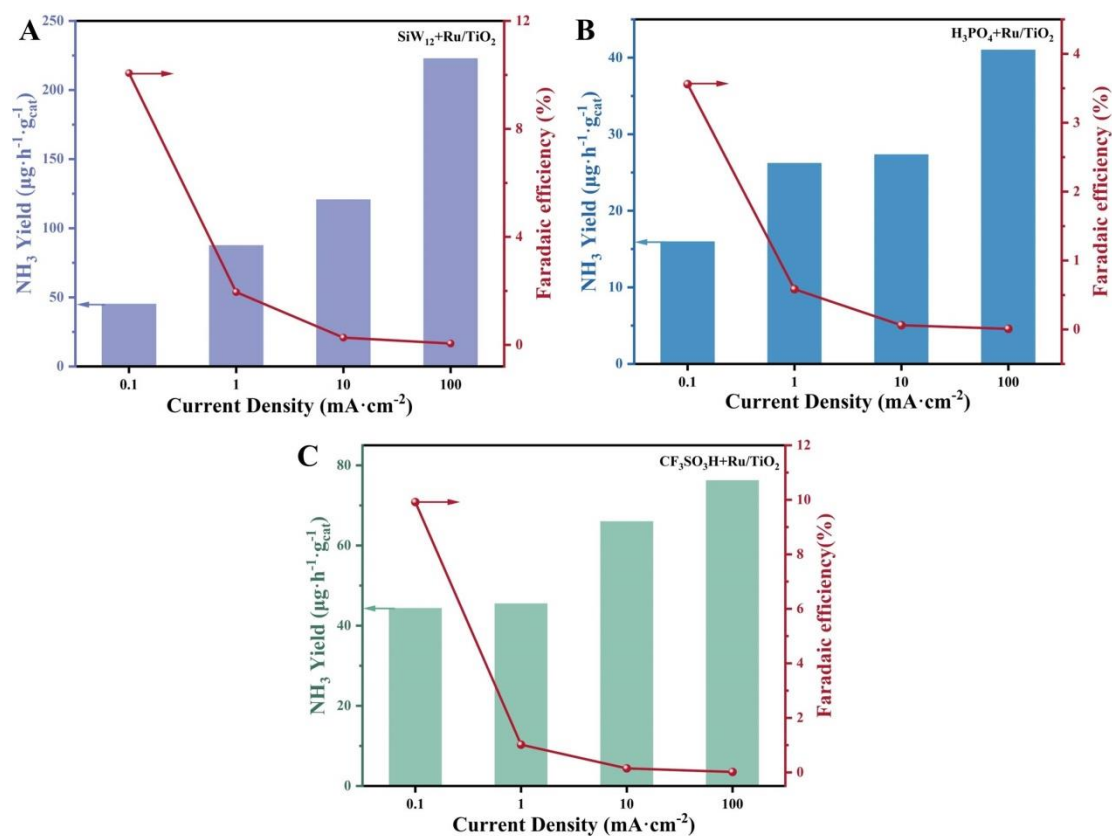

**Supplementary Fig.S9** Ammonia yields and corresponding faradaic efficiency in different acid solutions (pH value is same with each other) under different electrolysis current densities and 10mL/min  $\text{N}_2$ . **(A)** Ammonia yields and corresponding faradaic efficiency at electrolysis 4h in  $\text{SiW}_{12}$  solution (0.5g  $\text{SiW}_{12}$ , 35mL  $\text{H}_2\text{O}$ ) suspended with 0.05g  $\text{Ru}/\text{TiO}_2$  catalysts. **(B)** Ammonia yields and corresponding faradaic efficiency at electrolysis 4h in  $\text{H}_3\text{PO}_4$  solution suspended with 0.05g  $\text{Ru}/\text{TiO}_2$  catalysts. **(C)** Ammonia yields and corresponding faradaic efficiency at electrolysis 4h in  $\text{CF}_3\text{SO}_3\text{H}$  solution suspended with 0.05g  $\text{Ru}/\text{TiO}_2$  catalysts.

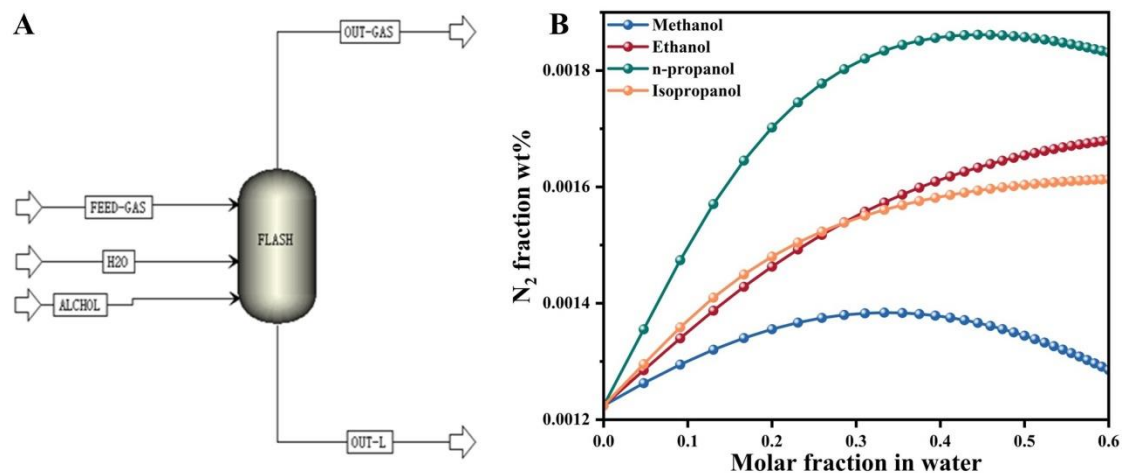

**Supplementary Fig.S10** The nitrogen gas solubility in alcohol-water is calculated by software of Aspen Plus V11. **(A)** The two-phase flash model was built to calculate the nitrogen gas solubility in water with concentration of different alcohols. An activity coefficient-based model of “NRTL” (Non-Random-Two-Liquid) was applied for the property method. **(B)** The calculated nitrogen gas solubility in water with different alcohol concentrations.



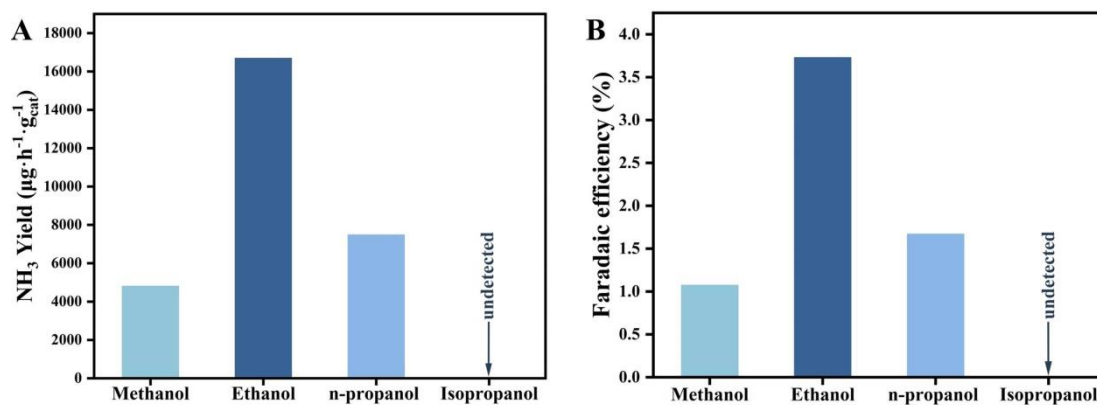

**Supplementary Fig.S11** (A) The ammonia yields and (B) corresponding faradaic efficiency at electrolysis 4h in different alcohol-SiW<sub>12</sub> aqueous solutions (0.5g SiW<sub>12</sub>, 3mL alcohol, 32mL H<sub>2</sub>O) suspended with 0.05g Ru/TiO<sub>2</sub> catalyst particles under constant electrolysis current density of 100 mA/cm<sup>2</sup> and 10mL/min N<sub>2</sub>.

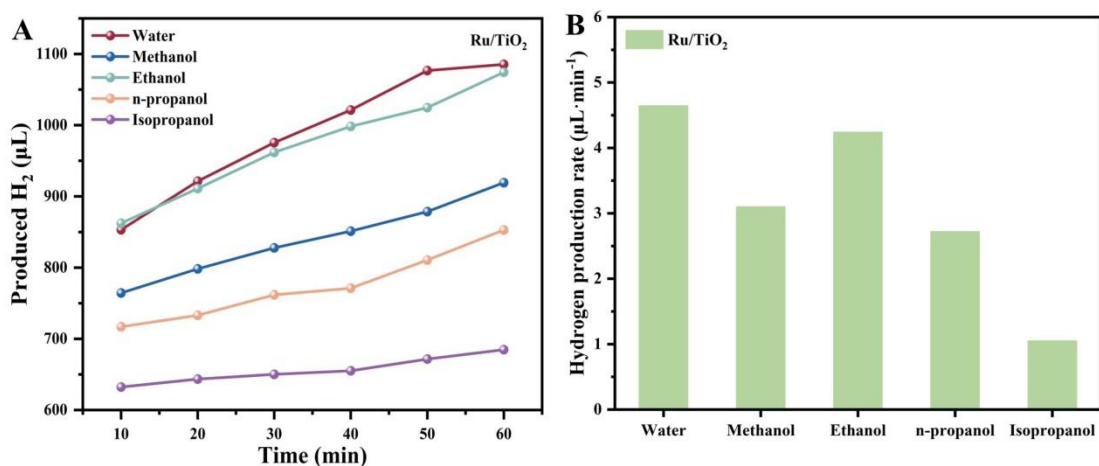

**Supplementary Fig.S12** Electron release rate of SiW<sub>12</sub> anion in different substances

as solvent. SiW<sub>12</sub> can transfer electrons from the cathode and then release electrons to reduce the protons for hydrogen H<sub>2</sub> gas generation over the suspended Ru/TiO<sub>2</sub> catalyst with a rather fast transfer rate. These processes could be described as

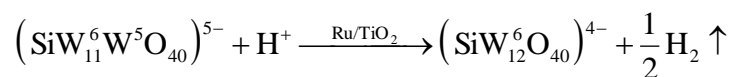

As seen, measuring the hydrogen H<sub>2</sub> production can estimate the electron release rate of SiW<sub>12</sub> anion. Consequently, the electron release rate of SiW<sub>12</sub> anion is estimated using hydrogen production rate. (A) and (B) are respectively the hydrogen H<sub>2</sub> gas volume *versus* time and production rate, which are measured when the electrolysis (current density is 100mA/cm<sup>2</sup>) of SiW<sub>12</sub> solution for 10min and then electrolysis stopped. The SiW<sub>12</sub> solution contains 3mL alcohols, 32mL H<sub>2</sub>O and 0.05g Ru/TiO<sub>2</sub>.

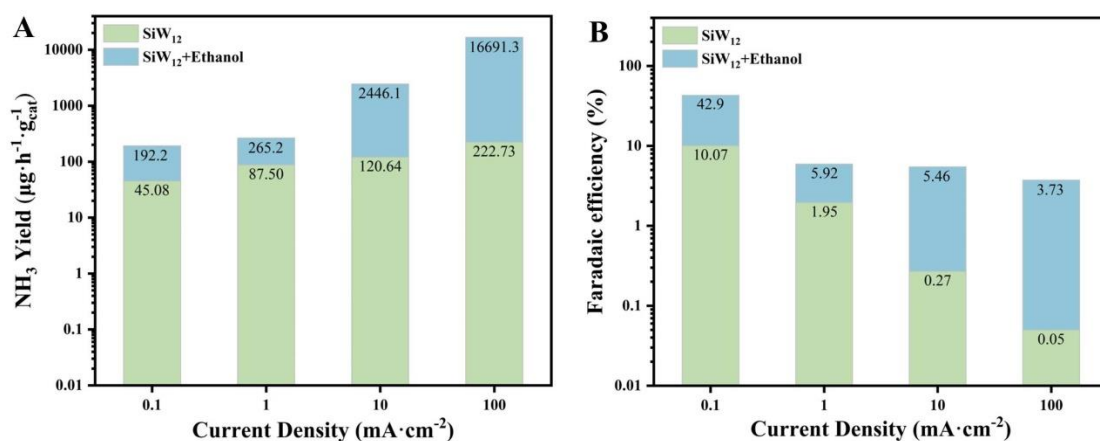

**Supplementary Fig.S13** (A) The ammonia yields and (B) corresponding faradaic efficiency at electrolysis 4h in SiW<sub>12</sub> aqueous solution (0.5g SiW<sub>12</sub>, 35mL H<sub>2</sub>O) and ethanol-SiW<sub>12</sub> aqueous solution (0.5g SiW<sub>12</sub>, 3mL ethanol, 32mL H<sub>2</sub>O) suspended with 0.05g Ru/TiO<sub>2</sub> catalyst particles under different electrolysis current densities and 10mL/min N<sub>2</sub>.

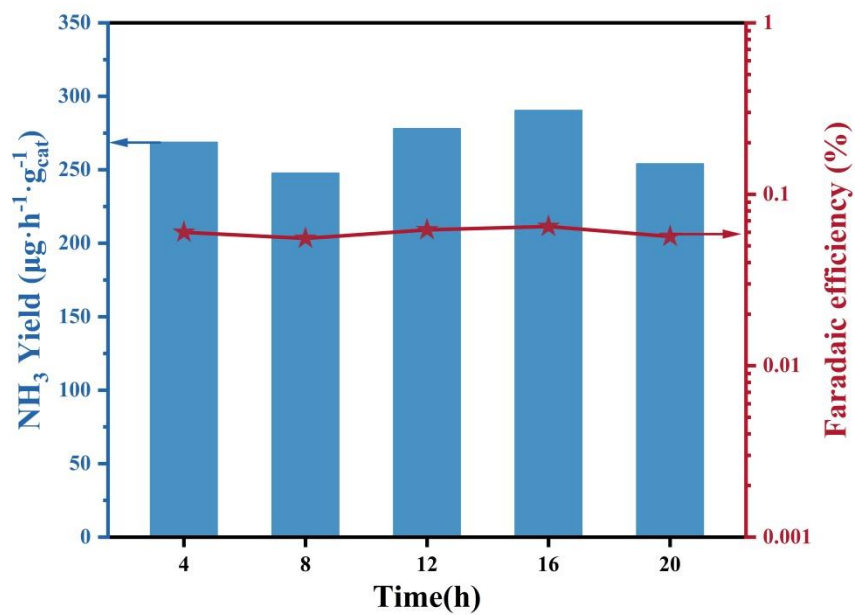

**Supplementary Fig.S14** Stability of ammonia productions was tested in SiW<sub>12</sub>-water solution (0.5g SiW<sub>12</sub>, 35mL H<sub>2</sub>O) suspended with 0.05g Ru/TiO<sub>2</sub> catalysts under a constant electrolytic current of 100 mA/cm<sup>2</sup> and 10mL/min N<sub>2</sub>. The every cycle test period is four hours.

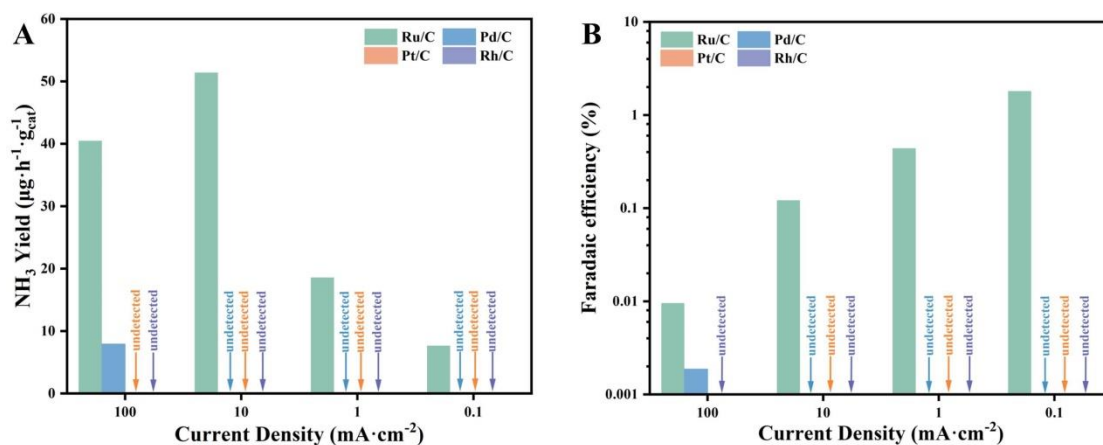

**Supplementary Fig.S15** (A) The ammonia yields and (B) corresponding faradaic efficiency at electrolysis 4h in SiW<sub>12</sub> aqueous solution (0.5g SiW<sub>12</sub>, 35mL H<sub>2</sub>O) suspended with different commercial carbon supported catalysts of Ru/C, Rh/C, Pt/C or Pd/C under different electrolysis current densities and 10mL/min N<sub>2</sub>. The amount of catalyst particles used was 0.05g and 5wt% metal loading on carbon support.

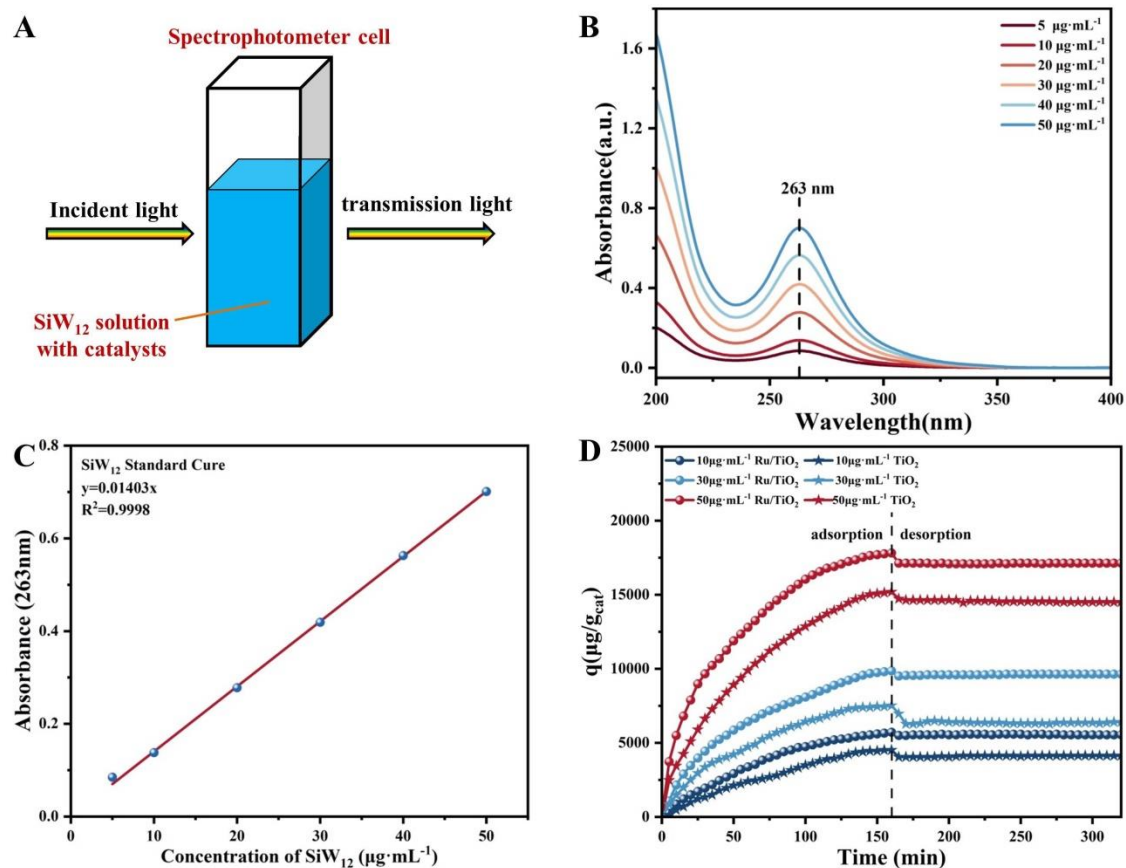

**Supplementary Fig.S16** (A) Schematic diagram of UV-Vis spectrophotometer for *in situ* measurements of SiW<sub>12</sub> adsorption and desorption kinetics on Ru/TiO<sub>2</sub> or TiO<sub>2</sub> suspended in SiW<sub>12</sub> aqueous solution. (B) The absorbance of SiW<sub>12</sub> aqueous solution with different known SiW<sub>12</sub> concentrations. (C) Standard curves of SiW<sub>12</sub> solution correlating the absorbance with SiW<sub>12</sub> concentrations. (D) Measured SiW<sub>12</sub> adsorption and desorption kinetics curves on Ru/TiO<sub>2</sub> and TiO<sub>2</sub> respectively.

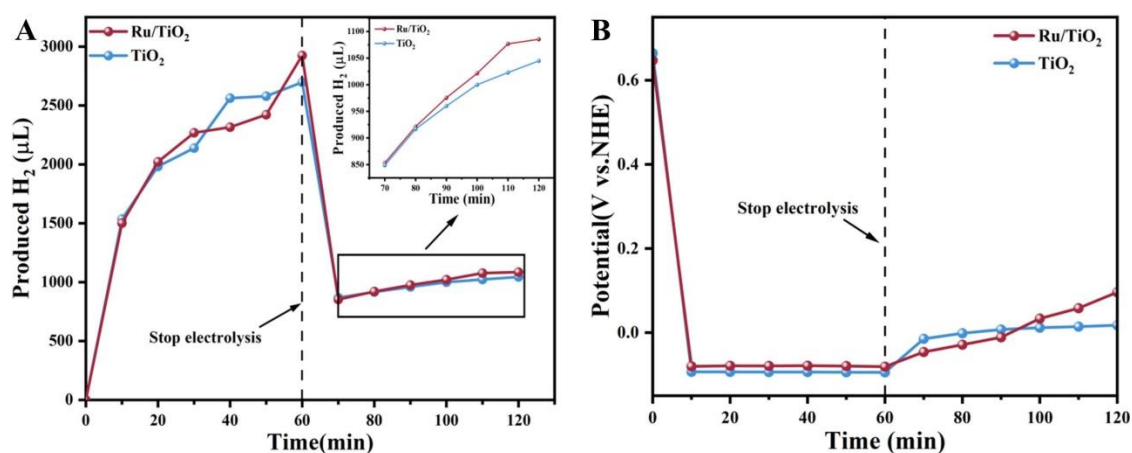

**Supplementary Fig.S17 (A)** Hydrogen H<sub>2</sub> gas evolution in SiW<sub>12</sub> aqueous solution respectively suspended with Ru/TiO<sub>2</sub> and TiO<sub>2</sub> catalysts under a constant electrolytic current of 100 mA/cm<sup>2</sup> (before 60 min) and without electrolysis (after 60 min). **(B)** Electrode potential changes of SiW<sub>12</sub> aqueous solution respectively suspended with Ru/TiO<sub>2</sub> and TiO<sub>2</sub> catalysts under a constant electrolytic current of 100 mA/cm<sup>2</sup> (before 60 min) and without electrolysis (after 60 min). Ag/AgCl electrode serve as counter electrode and reference electrode. In all above experiments, the amount of catalyst particles used was 0.05g and the SiW<sub>12</sub> aqueous solution contained 35mL H<sub>2</sub>O with 0.5g SiW<sub>12</sub>.

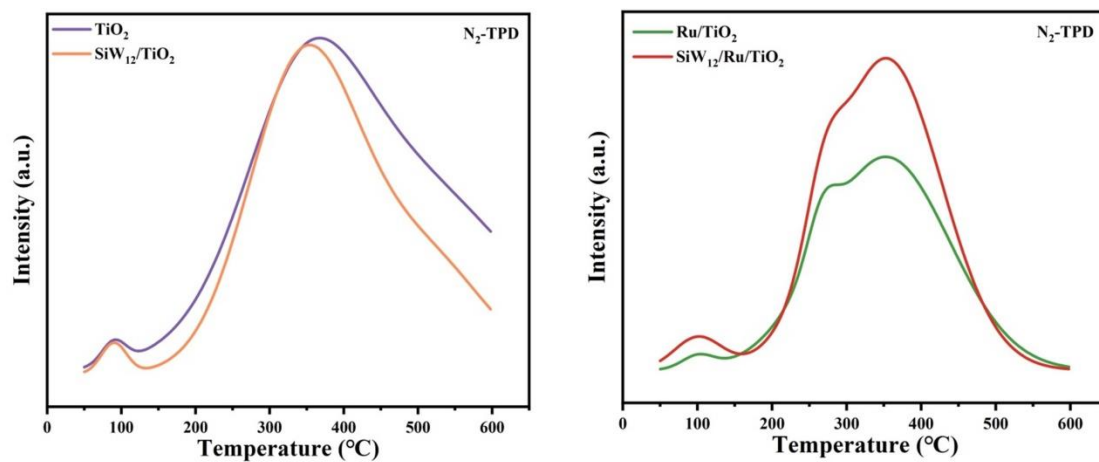

**Supplementary Fig.S18** TPD spectra of N<sub>2</sub> from Ru/TiO<sub>2</sub>, TiO<sub>2</sub>, SiW<sub>12</sub>/TiO<sub>2</sub> (TiO<sub>2</sub> adsorbed with SiW<sub>12</sub>) and SiW<sub>12</sub>/Ru/TiO<sub>2</sub> (Ru/TiO<sub>2</sub> adsorbed with SiW<sub>12</sub>) catalysts after exposure to N<sub>2</sub> at 50°C for 1h.



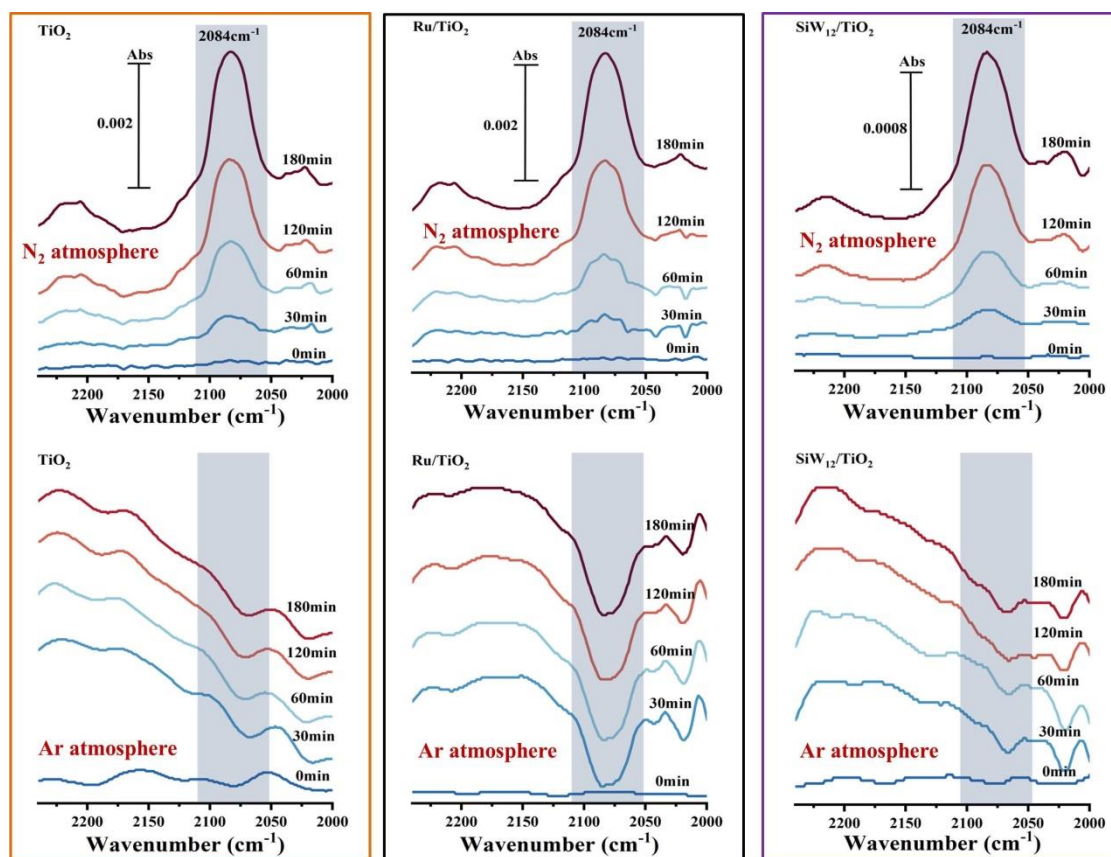

**Supplementary Fig.S19** *In-situ* FT-IR spectra of N<sub>2</sub> molecules adsorbed on TiO<sub>2</sub>, Ru/TiO<sub>2</sub> and SiW<sub>12</sub>/TiO<sub>2</sub> (TiO<sub>2</sub> adsorbed with SiW<sub>12</sub>) with time under ambient temperature and 1atm nitrogen atmosphere or 1atm argon atmosphere.

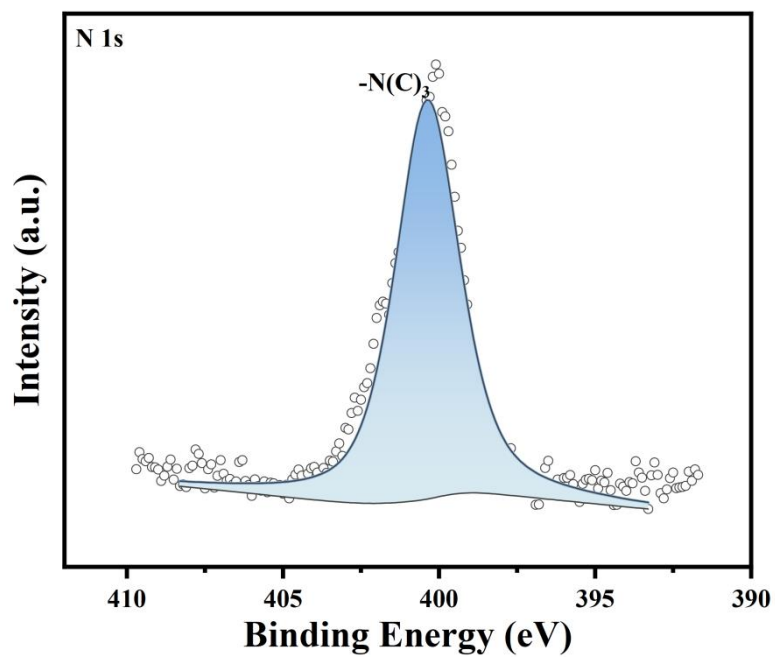

**Supplementary Fig.S20** N 1s XPS spectra of Ru/TiO<sub>2</sub> in SiW<sub>12</sub> aqueous solution after electrolysis 4h under 1atm argon Ar atmosphere (flow rate 10mL/min). Reaction solution volume is 35mL, and the aqueous solution contained 0.5g SiW<sub>12</sub>, 35mL H<sub>2</sub>O and 0.05g Ru/TiO<sub>2</sub>. The electrolytic current density is 100 mA/cm<sup>2</sup>.

## N<sub>2</sub> hydrogenation in distal pathway

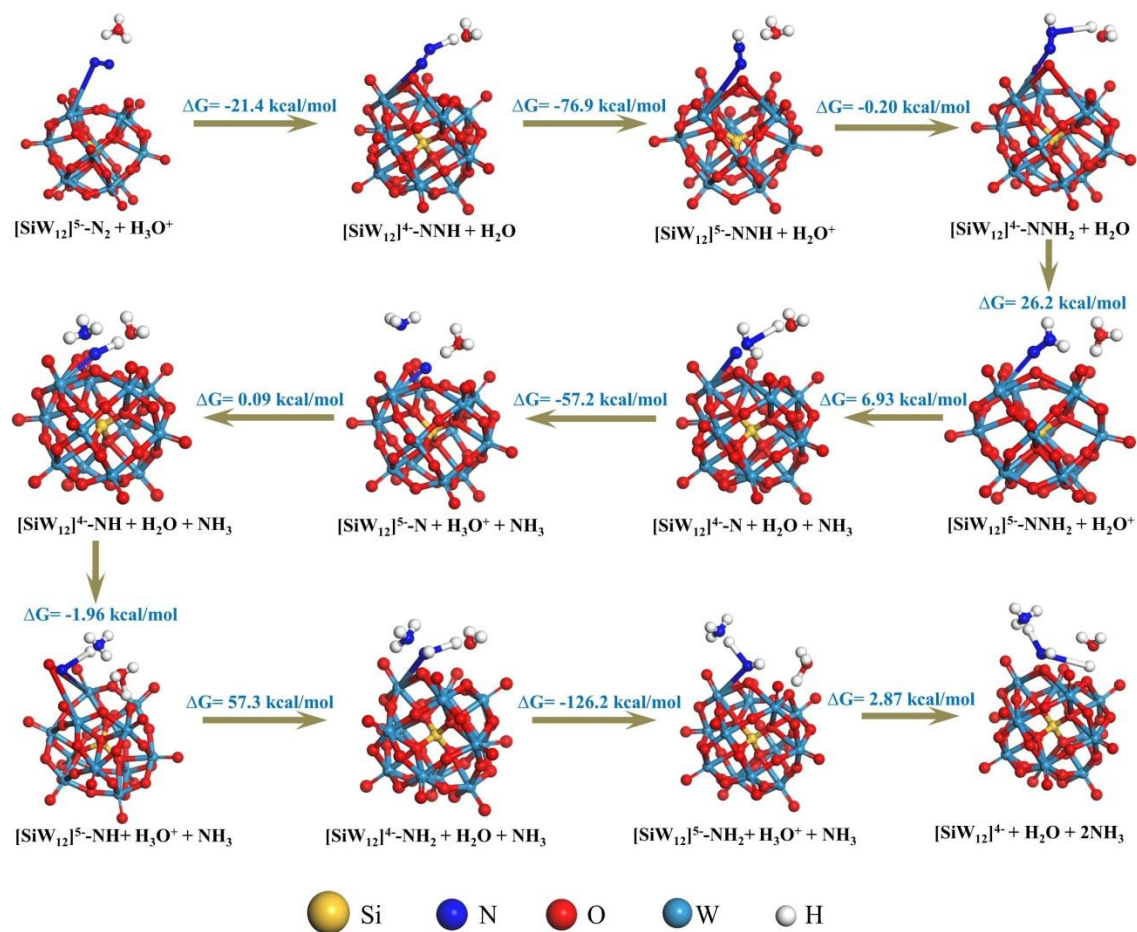

**Supplementary Fig.S21** Most stable configurations and free energy profiles in DFT calculations for nitrogen hydrogenation on SiW<sub>12</sub> in associative-distal pathway

### N<sub>2</sub> hydrogenation in alternating pathway

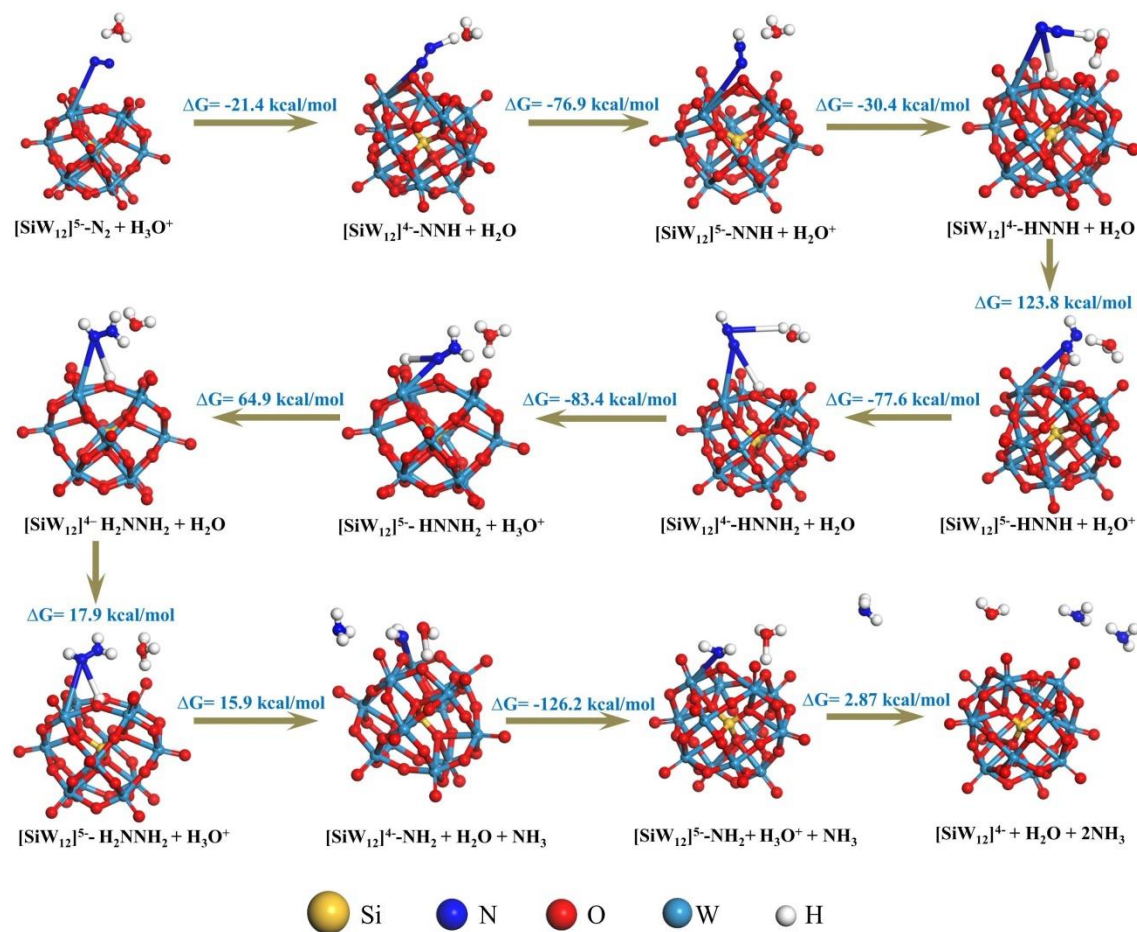

**Supplementary Fig.S22** Most stable configurations and free energy profiles in DFT calculations for nitrogen hydrogenation on SiW<sub>12</sub> in associative- alternating pathway

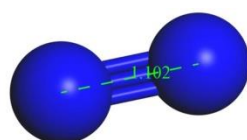

Nitrogen  $N_2$  molecule

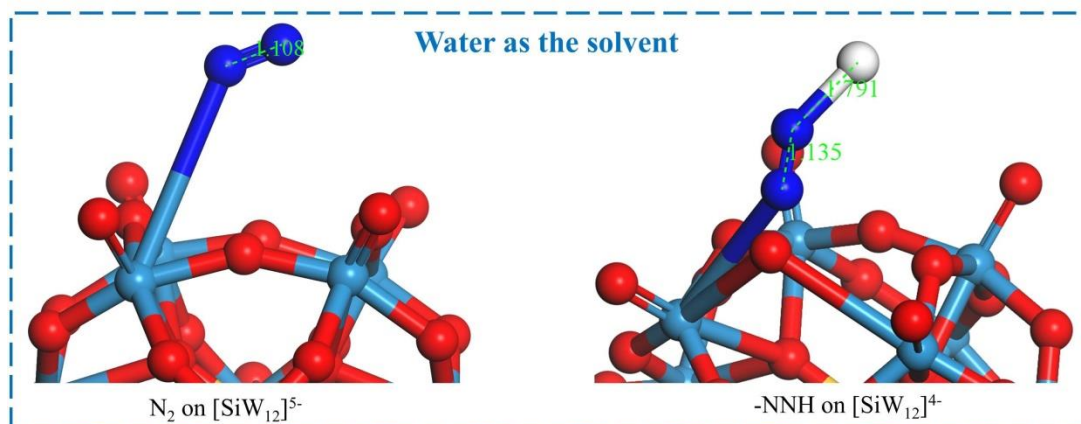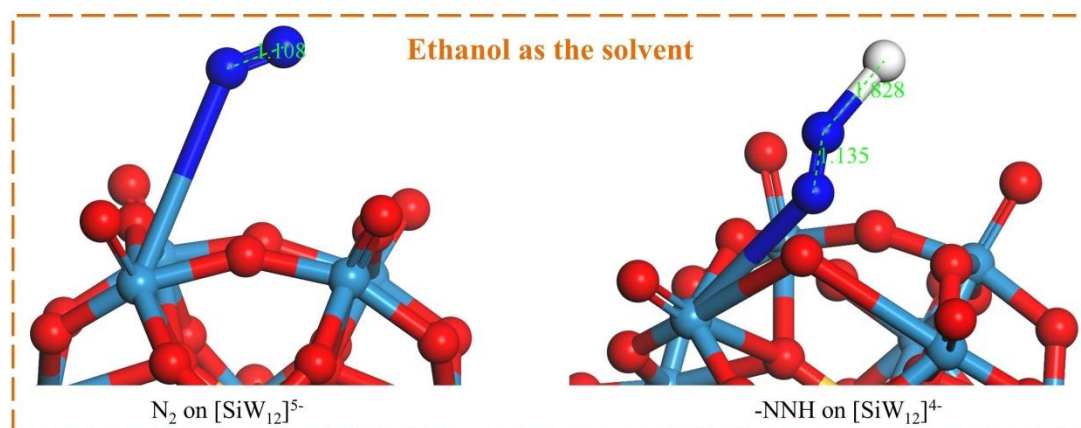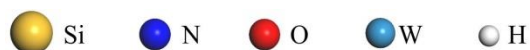

**Supplementary Fig.S23** Most stable configurations of nitrogen  $N_2$  in gas phase,  $N_2$  on  $[SiW_{12}]^{5-}$  and  $-NNH$  on  $[SiW_{12}]^{4-}$  in DFT calculations, and the bond length unit is Å. The bond length of  $N\equiv N$  is calculated as 1.102 Å and is prolonged to be 1.108 Å on  $[SiW_{12}]^{5-}$  in water or ethanol. The  $N=N$  bond length of  $-NNH$  is calculated as 1.135 Å in water or ethanol and the  $N-H$  bond length of  $-NNH$  is calculated as 1.791 Å and 1.828 Å respectively in water and ethanol.

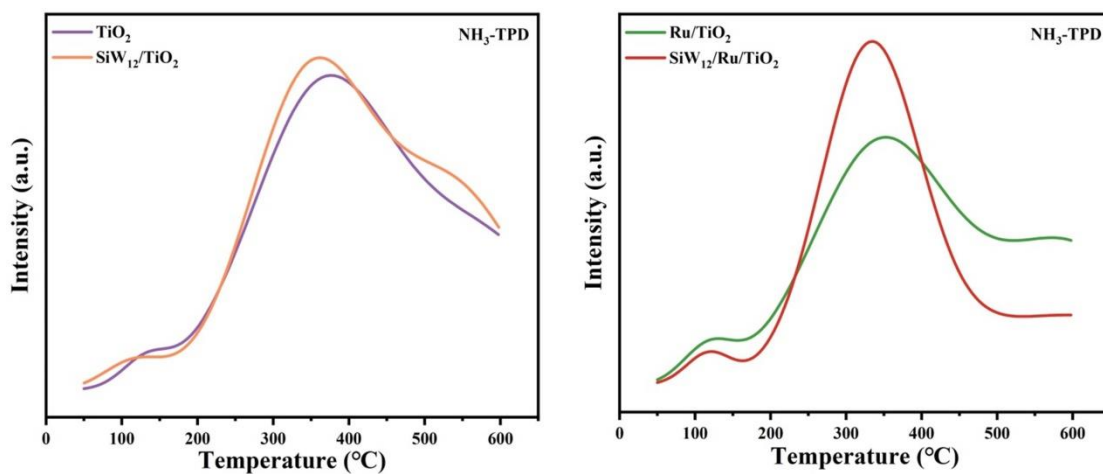

**Supplementary Fig.S24** TPD spectra of NH<sub>3</sub> from Ru/TiO<sub>2</sub>, TiO<sub>2</sub>, SiW<sub>12</sub>/TiO<sub>2</sub> (TiO<sub>2</sub> adsorbed with SiW<sub>12</sub>) and SiW<sub>12</sub>/Ru/TiO<sub>2</sub> (Ru/TiO<sub>2</sub> adsorbed with SiW<sub>12</sub>) catalysts after exposure to NH<sub>3</sub> at 50°C for 1h.

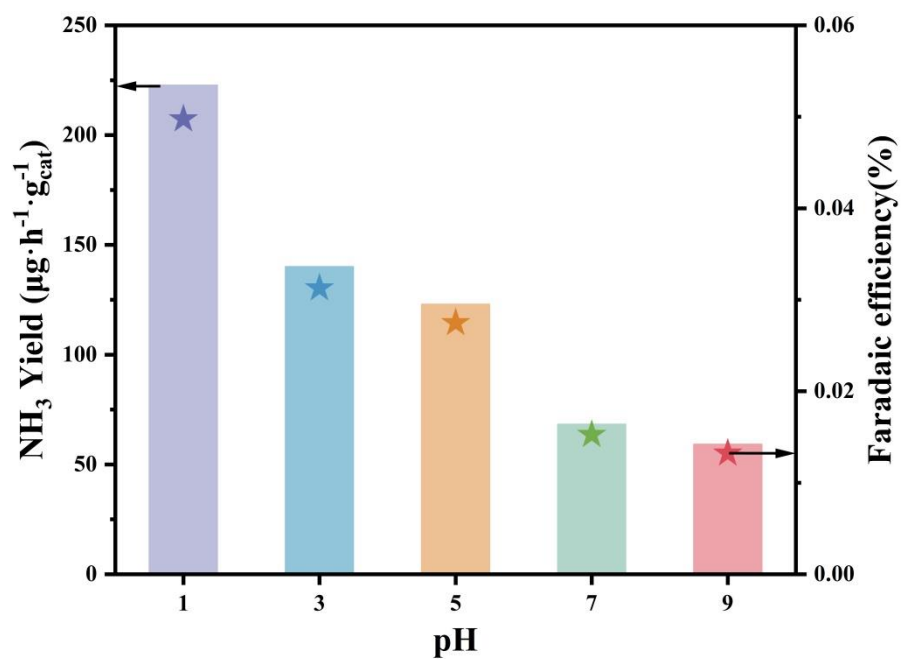

**Supplementary Fig.S25** Ammonia production and corresponding Faradaic efficiency at electrolysis 4h in SiW<sub>12</sub> solution suspended with Ru/TiO<sub>2</sub> under different pH conditions. Reaction solution: 0.5g SiW<sub>12</sub>, 35mL H<sub>2</sub>O and 0.05g Ru/TiO<sub>2</sub> catalysts. The electrolytic current density is 100 mA/cm<sup>2</sup> and the flow rate of nitrogen N<sub>2</sub> gas is 10mL/min.

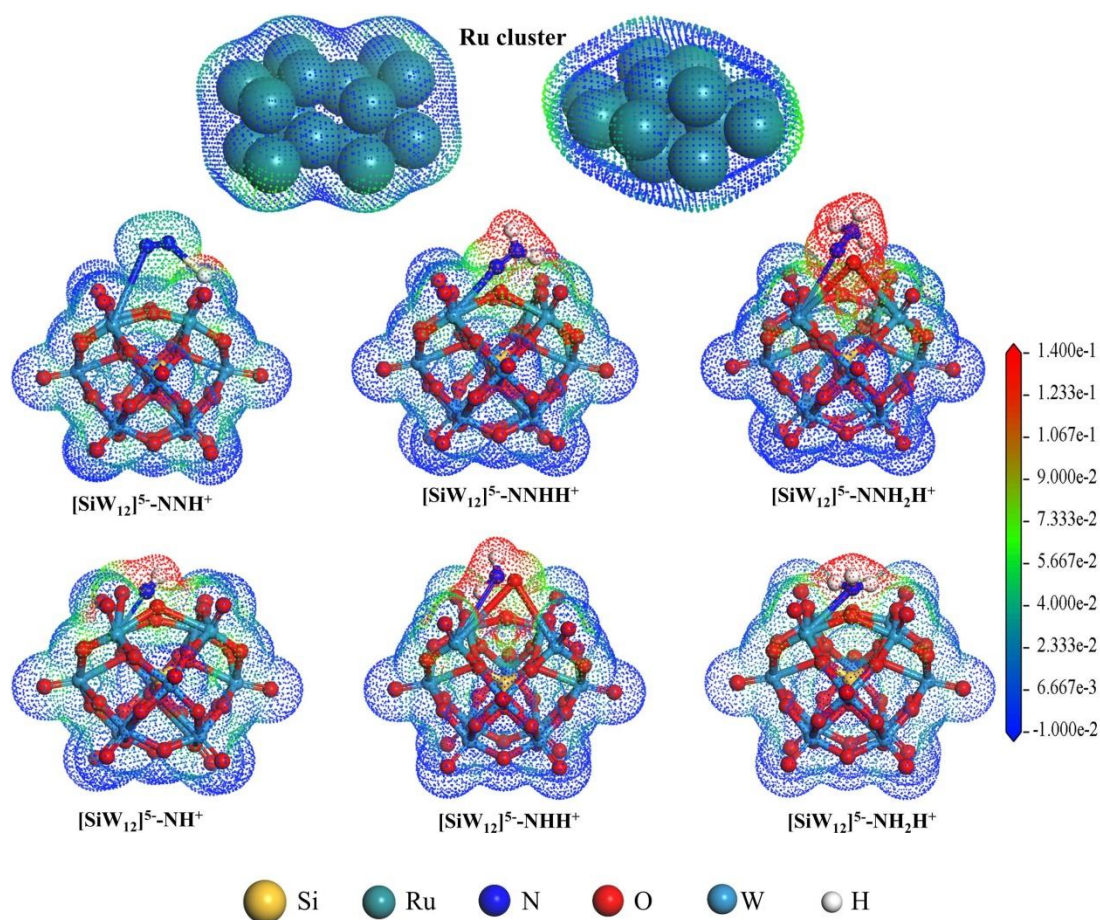

**Supplementary Fig.S26** The electrostatic potentials profiles of Ru cluster and  $\text{SiW}_{12}$  with  $[-\text{NNH}_n]^+$  or  $[-\text{NH}_n]^+$  species. These are the most stable configurations calculated by DFT calculations. The Ru cluster has almost negative potential profiles around the surface of Ru cluster and the  $[\text{SiW}_{12}]^{5-}$  anion also has the almost negative potential profiles. The  $[-\text{NNH}_n]^+$  and  $[-\text{NH}_n]^+$  show positive potential profiles, especially within the proton  $\text{H}^+$  zone and the positive potentials are enhanced with the hydrogenation reaction proceeded. This indicates the Ru cluster could repel the electrons from  $\text{SiW}_{12}$  and  $[-\text{NNH}_n]^+$  or  $[-\text{NH}_n]^+$  could attract electrons from  $\text{SiW}_{12}$ , which further confirms the stored electron can be pushed from  $\text{SiW}_{12}$  by Ru clusters to the adsorbed nitrogen species.



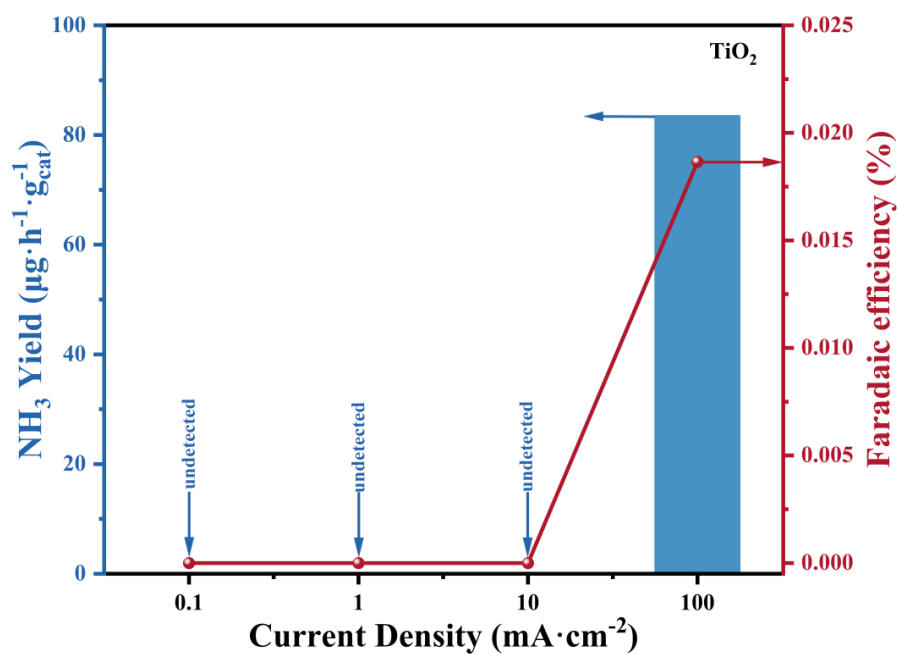

**Supplementary Fig.S27** Ammonia production and corresponding Faradaic efficiency at electrolysis 4h in SiW<sub>12</sub> solution suspended with only TiO<sub>2</sub> support under different current densities. Reaction solution: 0.5g SiW<sub>12</sub>, 35mL H<sub>2</sub>O and 0.05g TiO<sub>2</sub>. The flow rate of nitrogen N<sub>2</sub> gas is 10mL/min.

## Supplementary text

### 1. Structure characterizations of prepared Ru/TiO<sub>2</sub> catalyst

The X-ray diffraction (XRD) patterns of TiO<sub>2</sub> and Ru/TiO<sub>2</sub> catalysts are shown in Supplementary Fig.S28. As seen the catalysts exhibit characteristic peaks at 25.28 °, 37.8 °, 48.05 °, and 55.06 °, corresponding to the (101), (004), (200) and (211) crystal planes of the anatase structure of TiO<sub>2</sub> (PDF # 00-21-1272). In addition, the main peak of Ru/TiO<sub>2</sub> is slightly shifted to a lower diffraction angle compared to TiO<sub>2</sub>, indicating that Ru elements are successfully incorporated into the TiO<sub>2</sub> lattice[43]. The Ru/TiO<sub>2</sub> catalyst has a Ru loading of 0.28wt% which is measured by inductively coupled plasma emission spectrometry (ICP-OES). The nitrogen N<sub>2</sub> low temperature adsorption-desorption isotherm gives the pore size distribution of catalysts as shown in Supplementary Fig.S28. As seen, TiO<sub>2</sub> has a specific surface area of 145.24 m<sup>2</sup>/g, a pore volume of 0.287 cm<sup>3</sup>/g and a mean pore size of 6.59 nm. Ru/TiO<sub>2</sub> has a specific surface area of 130.24 m<sup>2</sup>/g, a pore volume of 0.271 cm<sup>3</sup>/g and a mean pore size of 7.04nm. This indicates that the Ru loading does not change the pore structure of TiO<sub>2</sub>.

SEM and TEM images reveal the morphology of TiO<sub>2</sub> and Ru/TiO<sub>2</sub> catalysts as shown in Supplementary Fig.S29. As seen, the Ru loading shows no effect on TiO<sub>2</sub> morphology. HRTEM analysis shows that Ru/TiO<sub>2</sub> nanoparticles have clearly visible lattice streaks, indicating that Ru/TiO<sub>2</sub> nanoparticles have high crystallinity. Analysis by Fast Fourier transform (FFT) technique shows that the lattice fringe spacing of Ru/TiO<sub>2</sub> nanoparticles is 0.348nm which ascribes to the (101) crystal plane of anatase TiO<sub>2</sub>, and 0.22 nm lattice fringe spacing which corresponds to the (111) crystal plane

of Ru[44,45]. In addition, the EDS elemental analysis diagram confirms the Ru element is evenly distributed on the TiO<sub>2</sub> support.

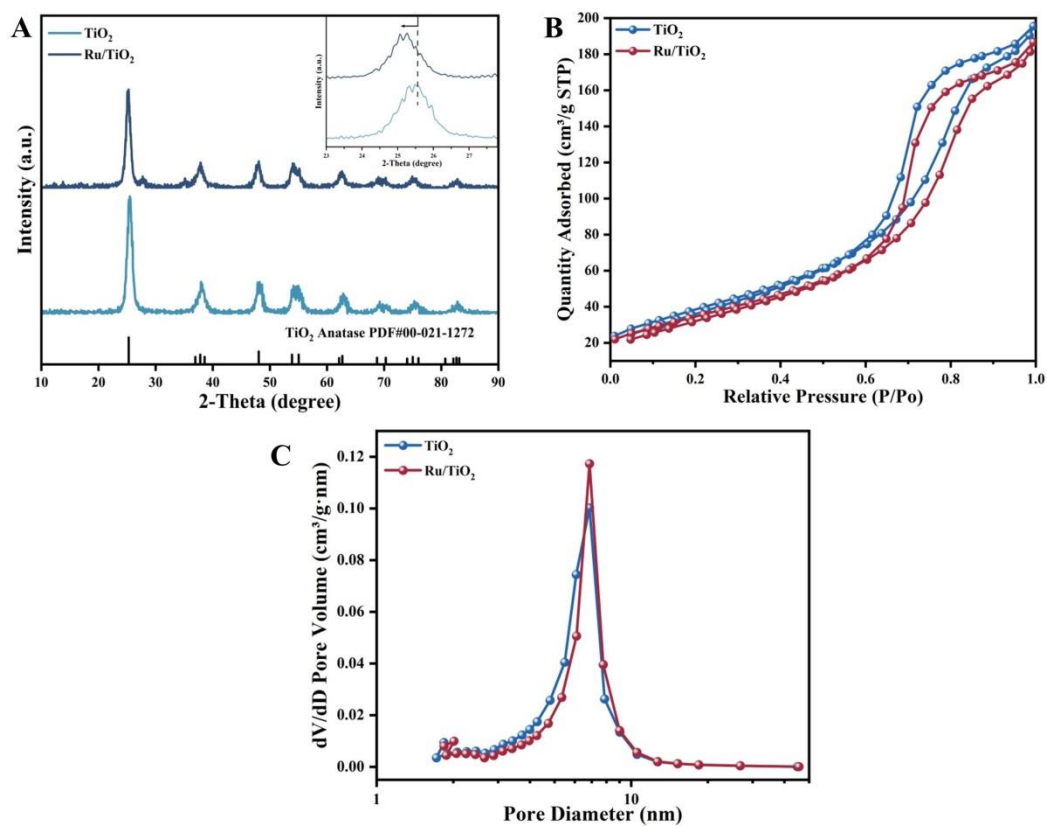

**Supplementary Fig.S28** (A) XRD patterns of TiO<sub>2</sub> and Ru/TiO<sub>2</sub>; (B) Nitrogen N<sub>2</sub> gas adsorption-desorption isotherms; (C) Pore size distributions of TiO<sub>2</sub> and Ru/TiO<sub>2</sub>.

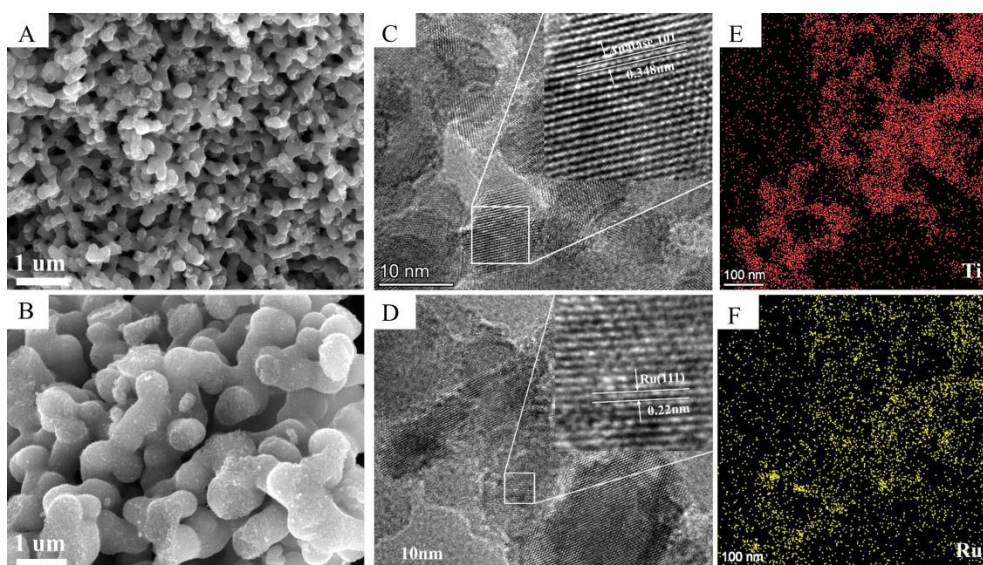

**Supplementary Fig.S29** SEM images of (A) TiO<sub>2</sub> and (B) Ru/TiO<sub>2</sub>; (C) and (D) are HRTEM images of Ru/TiO<sub>2</sub>; (E) and (F) are EDS analysis diagram of Ru/TiO<sub>2</sub>

The surface composition and element state of Ru/TiO<sub>2</sub> were further investigated by X-ray photoelectron spectroscopy (XPS) as shown in Supplementary Fig.S30. XPS spectra show that Ru/TiO<sub>2</sub> contain Ru, Ti and O elements. The peaks observed at 458.65 and 464.35 eV in the Ti 2p and Ru 3p spectra also match well with Ti<sup>4+</sup> 2p<sub>3/2</sub> and Ti<sup>4+</sup> 2p<sub>1/2</sub> [46,47], and the peaks at 472.13 and 477.35 eV are correlated with the satellite peaks of Ti[48]. The peaks at 461.18 and 483.18 eV in Ru 3p spectra are attributed to Ru 3p<sub>3/2</sub> and Ru 3p<sub>1/2</sub> respectively, suggesting that Ru species exist in a metallic state[49,50]. The O 1s spectra show lattice oxygen (O<sub>L</sub>, 529.85 eV) , Ru-O-Ti (531.3eV) and adsorbed water (O<sub>C</sub>, 533.2 eV)[51].

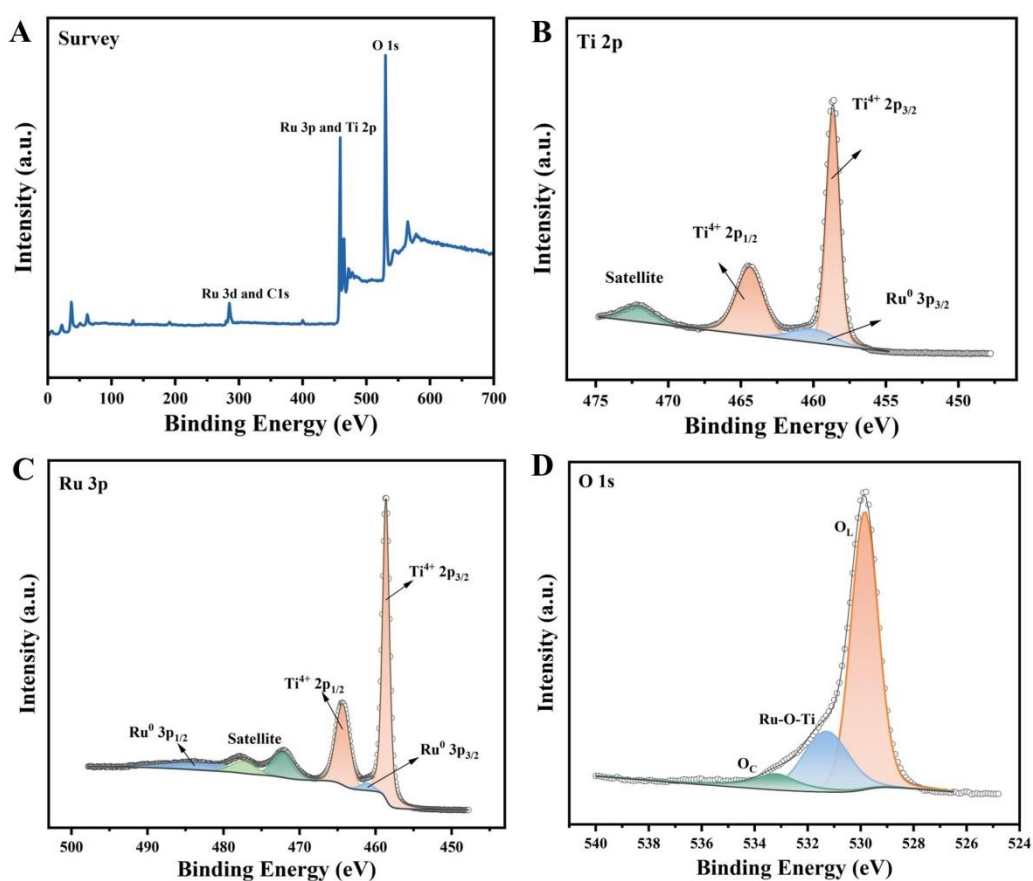

**Supplementary Fig.S30** High-resolution XPS spectra of Ru/TiO<sub>2</sub>: (A) full spectrum; (B) Ti 2p; (C) Ru 3p; (D) O 1s.

## 2. How the alcohols added in SiW<sub>12</sub> solution affect the ammonia production

In our proposed electrochemical system, the reaction for nitrogen hydrogenation into ammonia is

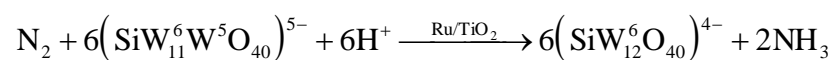

The catalyst Ru/TiO<sub>2</sub> is prepared and its pore size is around 7nm which is much larger than nitrogen size 0.364nm. SiW<sub>12</sub> is a relative large molecule with size of 1.08nm. Therefore, the nitrogen diffusion is not restrictive in pores of Ru/TiO<sub>2</sub> catalyst. But the SiW<sub>12</sub> diffusion needs to be considered. Now let us consider the SiW<sub>12</sub> mass balance in a spherical Ru/TiO<sub>2</sub> catalyst particle suspended in SiW<sub>12</sub> solution as show in Supplementary Fig.S31. To simplify, the capital letter A is used to denote the SiW<sub>12</sub> molecule.

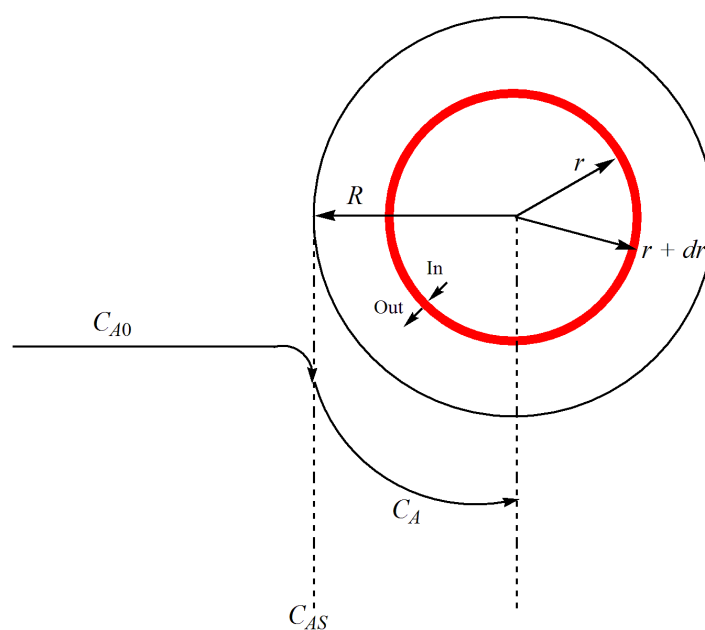

**Supplementary Fig.S31** Schematic diagram of SiW<sub>12</sub> mass balance in a spherical Ru/TiO<sub>2</sub> catalyst particle.

$C_{A0}$  represents the SiW<sub>12</sub> concentration in bulk solution;  $C_{AS}$  denotes the SiW<sub>12</sub> concentration on catalyst surface;  $C_A$  is the SiW<sub>12</sub> concentration within catalyst

particle;  $R$  is the radius of catalyst particle;  $r$  is the coordinate of  $\text{SiW}_{12}$  molecule within catalyst particle. The mass balance of  $\text{SiW}_{12}$  in an arbitrary spherical shell of catalyst particle is described as

$$\text{In (at } r) - \text{Out (} r + dr) + \text{Generation (within } dr) = 0$$

$$N_A \cdot 4\pi r^2 \Big|_r - N_A \cdot 4\pi r^2 \Big|_{r+\Delta r} + r_A S \rho 4\pi r_m^2 \Delta r = 0 \quad (\text{S-1})$$

where the  $N_A$  represents the diffusing flux of  $\text{SiW}_{12}$ ;  $r_A$  is the reaction rate based on the catalyst surface;  $S$  is the surface area per unit mass of catalyst;  $\rho$  is the mass density of catalyst;  $r_m$  represents the mean radius of spherical shell. When  $\Delta r \rightarrow 0$ , the equation (S-1) becomes

$$\frac{d(N_A r^2)}{dr} - r_A S \rho r^2 = 0 \quad (\text{S-2})$$

According to Fick's law, the  $N_A$  can be described as

$$N_A = -D_e \frac{dC_A}{dr} \quad (\text{S-3})$$

$D_e$  is the effective diffusivity of  $\text{SiW}_{12}$ . The reaction rate can be estimated using a power function as

$$r_A = -k_i C_A^n C_B^m C_C^q \quad (\text{S-4})$$

$k_i$  is the reaction constant;  $m$ ,  $n$  and  $q$  denoted the reaction orders;  $C_B$  denotes the nitrogen  $\text{N}_2$  concentration, that is nitrogen gas solubility.  $C_C$  denotes the proton  $\text{H}^+$  concentration. In our electrolytic system, the nitrogen  $\text{N}_2$  concentration in solution is constant under a given experimental conditions and the proton  $\text{H}^+$  concentration is rather large. Then the equation (S-4) can be simplified as

$$r_A = -k C_A^n \quad (\text{S-5})$$

where  $k = k_i C_B^m C_C^q$ .

Substituting equations (S-3) and (S-5) into (S-2), we can obtain

$$D_e \frac{1}{r^2} \frac{d}{dr} \left( r^2 \frac{dC_A}{dr} \right) - kS\rho C_A^n = 0 \quad (\text{S-6})$$

Let  $\psi = C_A/C_{AS}$ ,  $\lambda = r/R$ , the equation (S-6) becomes

$$\frac{1}{\lambda^2} \frac{d}{d\lambda} \left( \lambda^2 \frac{d\psi}{d\lambda} \right) - \frac{kS\rho R^2 C_{AS}^{n-1}}{D_e} \psi^n = 0 \quad (\text{S-7})$$

Define the Thiele modulus  $\phi_n$  as

$$\phi_n^2 = \frac{kS\rho R^2 C_{AS}^{n-1}}{D_e} \quad (\text{S-8})$$

For nitrogen hydrogenation into ammonia, the reaction order for nitrogen is usually as  $\sim 1$  and assuming the reaction order for  $\text{SiW}_{12}$  is one. Therefore, the equation (S-7) can be solved as

$$\psi = \frac{C_A}{C_{AS}} = \frac{1}{\lambda} \left( \frac{\sinh \phi_1 \lambda}{\sinh \phi_1} \right) \quad (\text{S-9})$$

Define the internal effective factor  $\eta$  as

$$\eta = \frac{\text{Actual overall rate of reaction}}{\text{Rate of reaction is when entire interior surface were exposed to the external pellet surface}} \quad (\text{S-10})$$

The internal effective factor  $\eta$  can be expressed as

$$\eta = \frac{3}{\phi_1^2} (\phi_1 \coth \phi_1 - 1) \quad (\text{S-11})$$

where

$$\phi_1 = \sqrt{\frac{kS\rho R^2}{D_e}} \quad (\text{S-12})$$

As seen, the internal effective factor  $\eta$  is a monotonically decreasing function versus Thiele modulus  $\phi_1$  which is also a function of reaction rate and diffusion rate. It is found that the presence of alcohol in  $\text{SiW}_{12}$  solution could not only change the rate of

electron release of  $\text{SiW}_{12}$  anion, but also change the diffusion rate of  $\text{SiW}_{12}$  as shown in Supplementary Fig.S32.

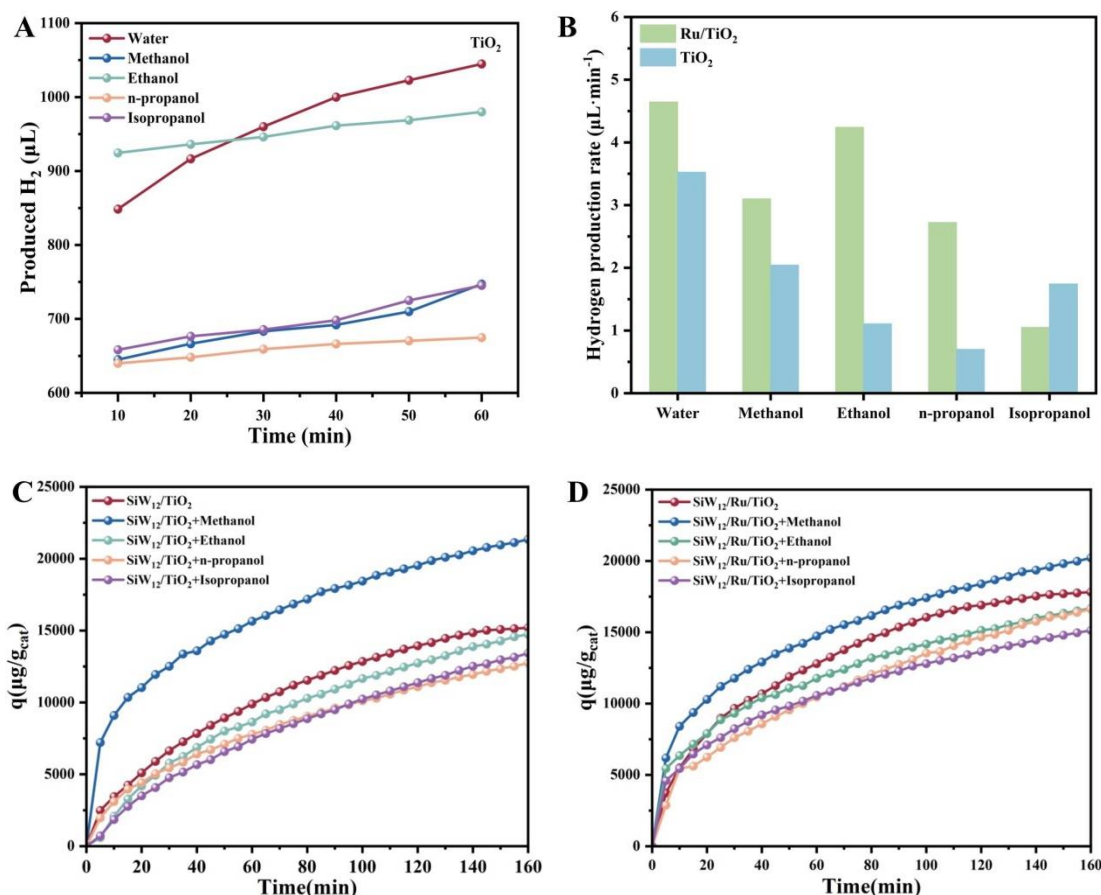

**Supplementary Fig.S32** (A) Hydrogen  $\text{H}_2$  volume *versus* time on  $\text{TiO}_2$  are measured when the electrolysis (current density is  $100\text{mA}/\text{cm}^2$ ) of  $\text{SiW}_{12}$  solution for 10min and then electrolysis stopped ( $\text{SiW}_{12}$  solution contains 3mL alcohols, 32mL  $\text{H}_2\text{O}$  and 0.05g  $\text{TiO}_2$ ). The hydrogen  $\text{H}_2$  volume *versus* time on  $\text{Ru}/\text{TiO}_2$  can be found in *Supplementary Fig.S12A*. (B) Electron release rate is estimated using the hydrogen  $\text{H}_2$  production rate calculated from the data of hydrogen  $\text{H}_2$  volume *versus* time. (C) and (D) are adsorption kinetics curves of  $\text{SiW}_{12}$  respectively on the  $\text{Ru}/\text{TiO}_2$  and  $\text{TiO}_2$  measured in aqueous solution with  $\text{SiW}_{12}$  concentration of  $50\mu\text{g}/\text{mL}$  and alcohol concentration of  $0.088\text{mL}/\text{mL}$ .



### 3. How the alcohols affect the ammonia determination by Nessler's reagents

In order to estimate the effects of water-soluble alcohols added into the reaction solution on the ammonia ion determination by Nessler's reagents, 3 mL alcohols were added into 32 mL water to get alcohol-water solution. Then 1 mL solution was taken out and added into 4 mL water to obtain 5 mL dilute alcohol-water solution. Finally, 0.2 mL Nessler's reagents were added into the 5 mL dilute alcohol-water solution to conduct UV-Vis spectroscopy measurements. As shown in Supplementary Fig.S33, absorbance with or without alcohols are almost the same with each other, indicating that adding 3 mL alcohols into 32 mL water shows no effect on the ammonia determination by Nessler's reagents.

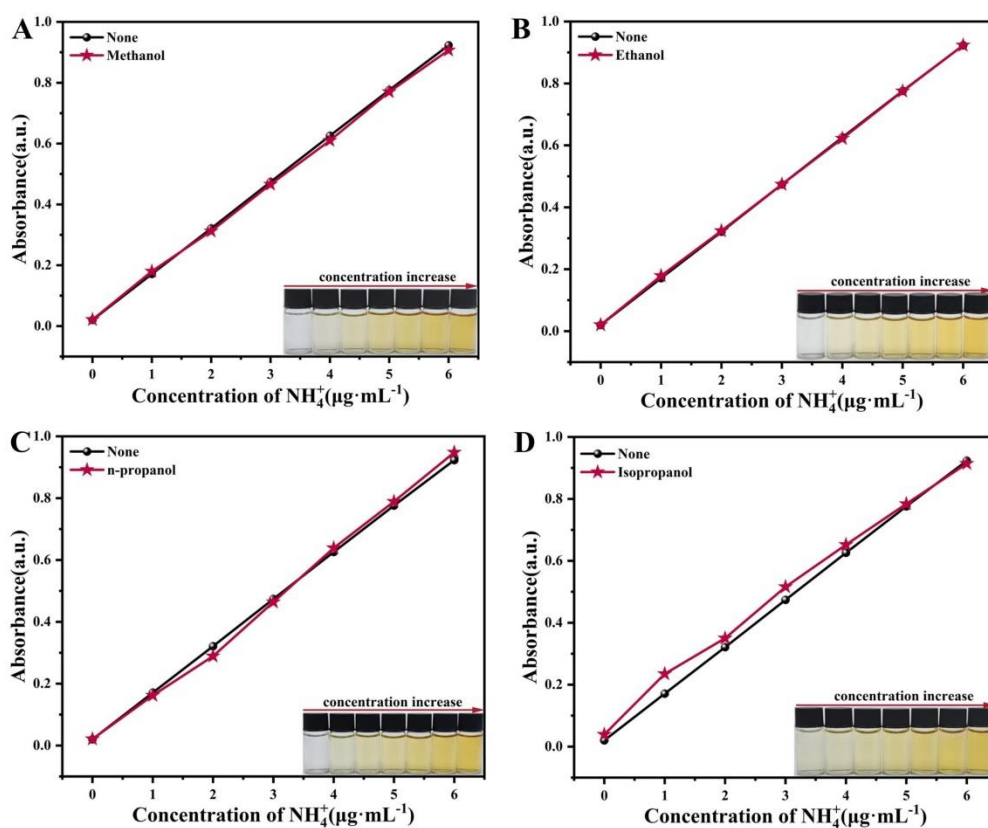

**Supplementary Fig.S33** The UV-Vis absorbance of aqueous solution with different concentrations of  $\text{NH}_4^+$  without or with different alcohols: (A) methanol, (B) ethanol, (C) n-propanol and (D) isopropanol.

#### **4. Comparison of ammonia determination by $^1\text{H-NMR}$ or ion chromatography method with the colorimetric method of Nessler's reagents**

The isotope experiments using  $^{15}\text{N}_2$  as the feeding nitrogen gas are quantitatively analyzed to validate the yield rate of the detected ammonia. In order to compare, the colorimetric method was also used to test ammonia using  $^{15}\text{N}_2$  as the feeding nitrogen gas. As shown in Supplementary Fig.S34, the ammonia in a sample reaction solution was determined respectively as 8.35  $\mu\text{g/mL}$  by Nessler's reagents and 7.43  $\mu\text{g/mL}$  by  $^1\text{H-NMR}$  spectra. Furthermore, the ion chromatography was also used to verify the amount of ammonia produced and compared with the colorimetric method. As shown in Supplementary Fig.S35, the ammonia in a sample reaction solution was determined respectively as 1.39  $\mu\text{g/mL}$  by ion chromatography and 1.27  $\mu\text{g/mL}$  by colorimetric method of Nessler's reagents. These comparable values of ammonia produced with different methods indicate that the ammonia produced in our work could be accurately measured using colorimetric method. Hence, the colorimetric method of UV-Vis spectroscopy through the colorimetric reactions of Nessler's reagents was applied to quantify ammonia product in this work, due to its characteristic of accurate and easy quantification.

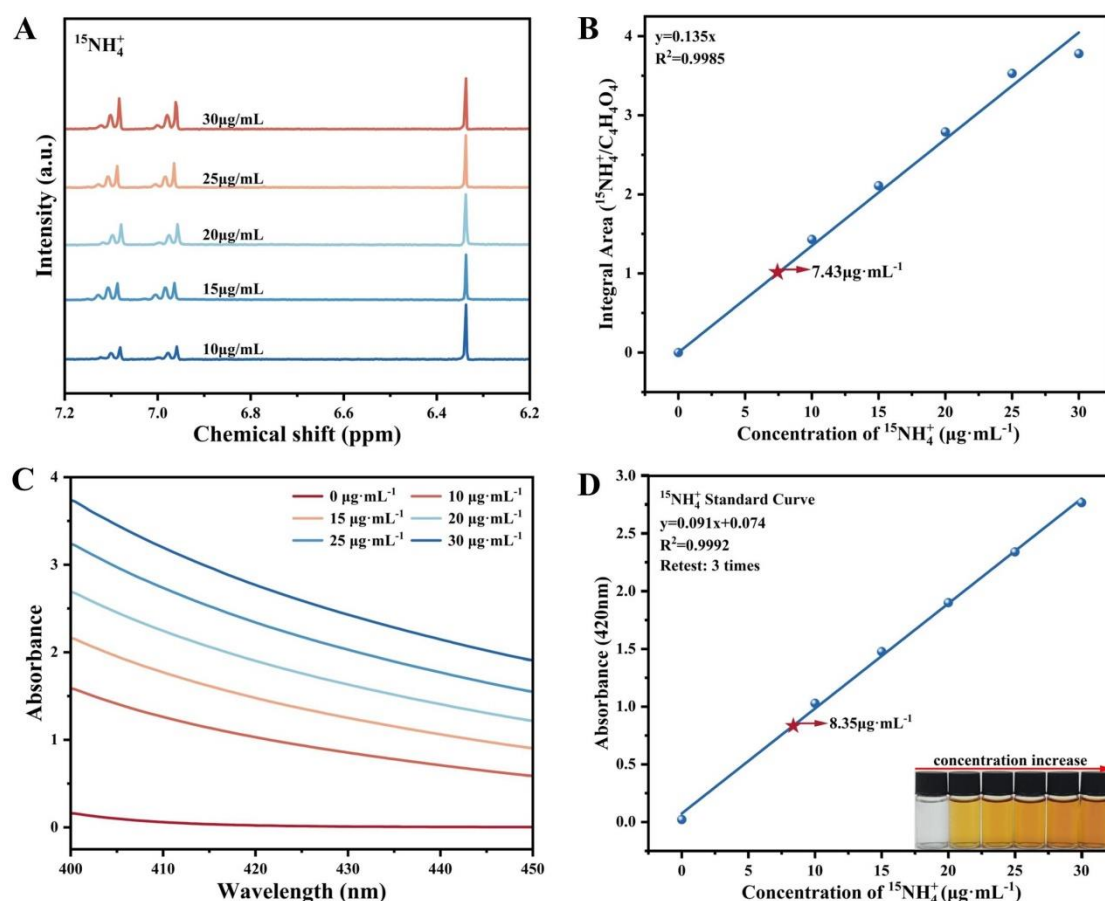

**Supplementary Fig.S34** Electrocatalysis of nitrogen to ammonia using isotopic labeling  $^{15}\text{N}_2$  as nitrogen gas feedstock. (A) NMR intensity of  $^{15}\text{NH}_4\text{Cl}$  with different concentrations. The maleic acid,  $\text{C}_4\text{H}_4\text{O}_4$ , was used as the internal standard substance to give calibration curve. (B) Calibration curves for  $^{15}\text{NH}_4\text{Cl}$  are based on peak area of NMR intensity. (C) UV-Vis absorbance of  $^{15}\text{NH}_4\text{Cl}$  aqueous solutions with known  $^{15}\text{NH}_4\text{Cl}$  concentrations. (D) Standard curve of the absorbance at 420 nm of  $^{15}\text{NH}_4\text{Cl}$  aqueous solutions with different  $^{15}\text{NH}_4\text{Cl}$  concentrations. The ammonia in a sample reaction solution (denoted by asterisk on curve) was determined respectively as 8.35  $\mu\text{g}/\text{mL}$  by Nessler' reagents and 7.43  $\mu\text{g}/\text{mL}$  by  $^1\text{H}$ -NMR spectra.

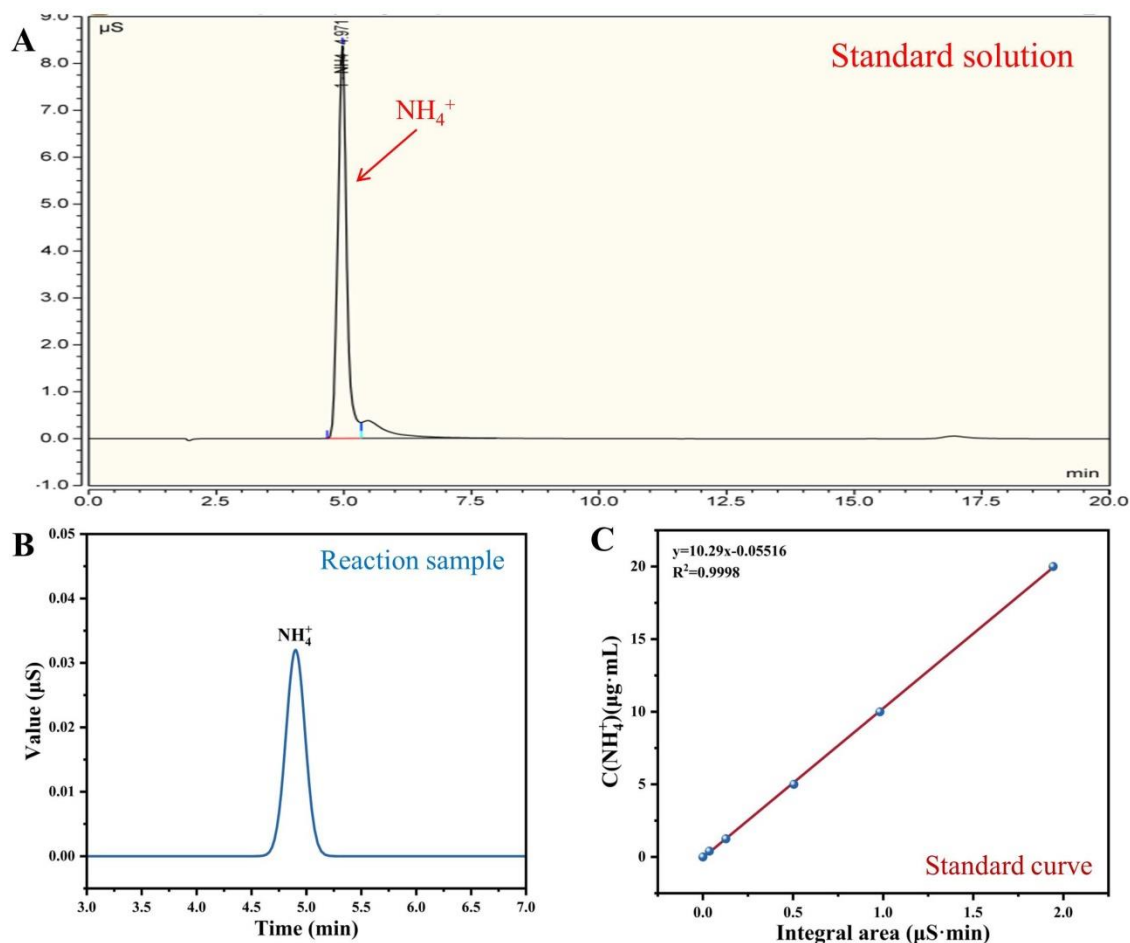

**Supplementary Fig.S35** Ion chromatography was used to quantify ammonia product.

(A) Ion chromatogram of a sample of 11.95  $\mu\text{g}/\text{mL}$  ammonium ion  $\text{NH}_4^+$  standard solution. (B) Ion chromatogram of an electrocatalytic reaction sample collected from  $\text{SiW}_{12}$  solution after reaction 4h. Reaction solution: 0.5g  $\text{SiW}_{12}$ , 35mL  $\text{H}_2\text{O}$  and 0.05g  $\text{Ru}/\text{TiO}_2$ . (C) Calibration curve for  $\text{NH}_4^+$  concentration related to the chromatographic peak area. The ammonia in the sample reaction solution was determined respectively as 1.39  $\mu\text{g}/\text{mL}$  by ion chromatography and 1.27  $\mu\text{g}/\text{mL}$  by Nessler' reagents.

## 5. Interaction determination between $\text{SiW}_{12}$ and catalyst $\text{Ru}/\text{TiO}_2$

From the discussions in main body of this work, the adsorption and desorption kinetic experiments show that the  $\text{SiW}_{12}$  anions can be adsorbed on  $\text{Ru}/\text{TiO}_2$  and have strong interactions with the Ru clusters. The element distributions from TEM images further suggest that the element Si has almost the same distribution as the element of Ru (see Fig.4b in main body of this work). Moreover, from the structure of  $\text{SiW}_{12}$  as shown in Supplementary Fig.S36, we can find that the Si is located in the center of the Keggin-structured  $\text{SiW}_{12}$  anion. These experimental facts confirm that the adsorbed  $\text{SiW}_{12}$  anions are distributed on the Ru clusters of  $\text{Ru}/\text{TiO}_2$ .

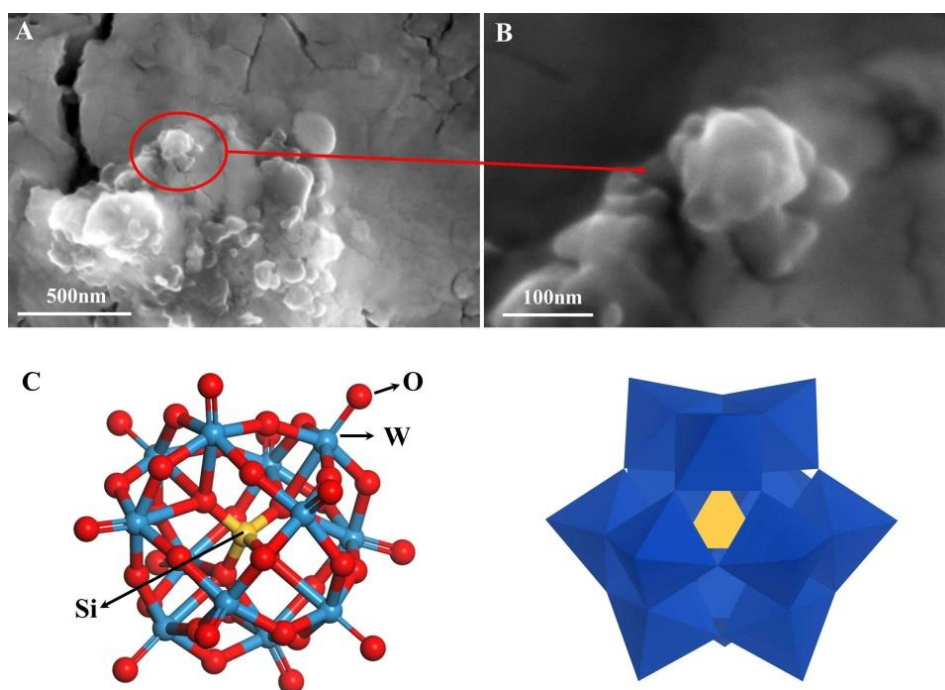

**Supplementary Fig.S36** (A) and (B) are SEM images of  $\text{SiW}_{12}$ ; (C) A Keggin-type polyoxometalate  $\text{SiW}_{12}$  with Keggin-structured  $[\text{SiW}_{12}]^{4-}$  anion.

In order to further evaluate the interactions of SiW<sub>12</sub> with Ru, the XPS spectra were used to check what kind of interactions (physical or chemical) between SiW<sub>12</sub> and Ru. Herein, the XPS spectra of Ru/TiO<sub>2</sub> (Ru 3p and O 1s) and SiW<sub>12</sub> (W 4f and O 1s) are shown in Supplementary Fig.S37 and the XPS spectra of SiW<sub>12</sub> adsorbed on Ru/TiO<sub>2</sub>, [SiW<sub>12</sub>/Ru/TiO<sub>2</sub> (Ru 3p, W 4f and O 1s)], can be found in Supplementary Fig.S38. It is found that the bond energy values of Ru 3p (**3p<sub>3/2</sub>: 461.54eV and 3p<sub>1/2</sub>: 485.55eV**) and O 1s (**O<sub>t</sub> 530.17eV, O<sub>b</sub> 531.5eV and O<sub>i</sub> 533.2eV**) of SiW<sub>12</sub>/Ru/TiO<sub>2</sub> are almost same with the bond energy values of Ru 3p (**3p<sub>3/2</sub> 461.18eV and 3p<sub>1/2</sub> 485.18eV**) of Ru/TiO<sub>2</sub> and O 1s (**O<sub>t</sub> 530.7eV, O<sub>b</sub> 531.5eV and O<sub>i</sub> 532.8eV**) of SiW<sub>12</sub>, in which O<sub>t</sub> is the surface terminal oxygen (W=O), O<sub>b</sub> is the bridging oxygen (W-O-W) and O<sub>i</sub> is the central oxygen (Si-O-Si). The bond energy values of W 4f of SiW<sub>12</sub>/Ru/TiO<sub>2</sub> (**4f<sub>7/2</sub> 35.53eV and 4f<sub>5/2</sub> 37.68eV**) are almost same with the bond energy values of W 4f of SiW<sub>12</sub> (**4f<sub>7/2</sub>: 35.81eV and 4f<sub>5/2</sub>: 37.94eV**). All these results indicate that when SiW<sub>12</sub> is adsorbed on Ru/TiO<sub>2</sub>, no bond energy changes, suggesting that there are no chemical bonds formed between SiW<sub>12</sub> and Ru/TiO<sub>2</sub>. This means there are just strong physical interactions between SiW<sub>12</sub> and Ru/TiO<sub>2</sub> catalyst. The [SiW<sub>12</sub>]<sup>4-</sup> or [SiW<sub>12</sub>]<sup>5-</sup> anion is about 1nm in size and have many charges, so that the strong Vander Waals force and electrostatic force play important roles in the physical interactions between SiW<sub>12</sub> and catalyst.

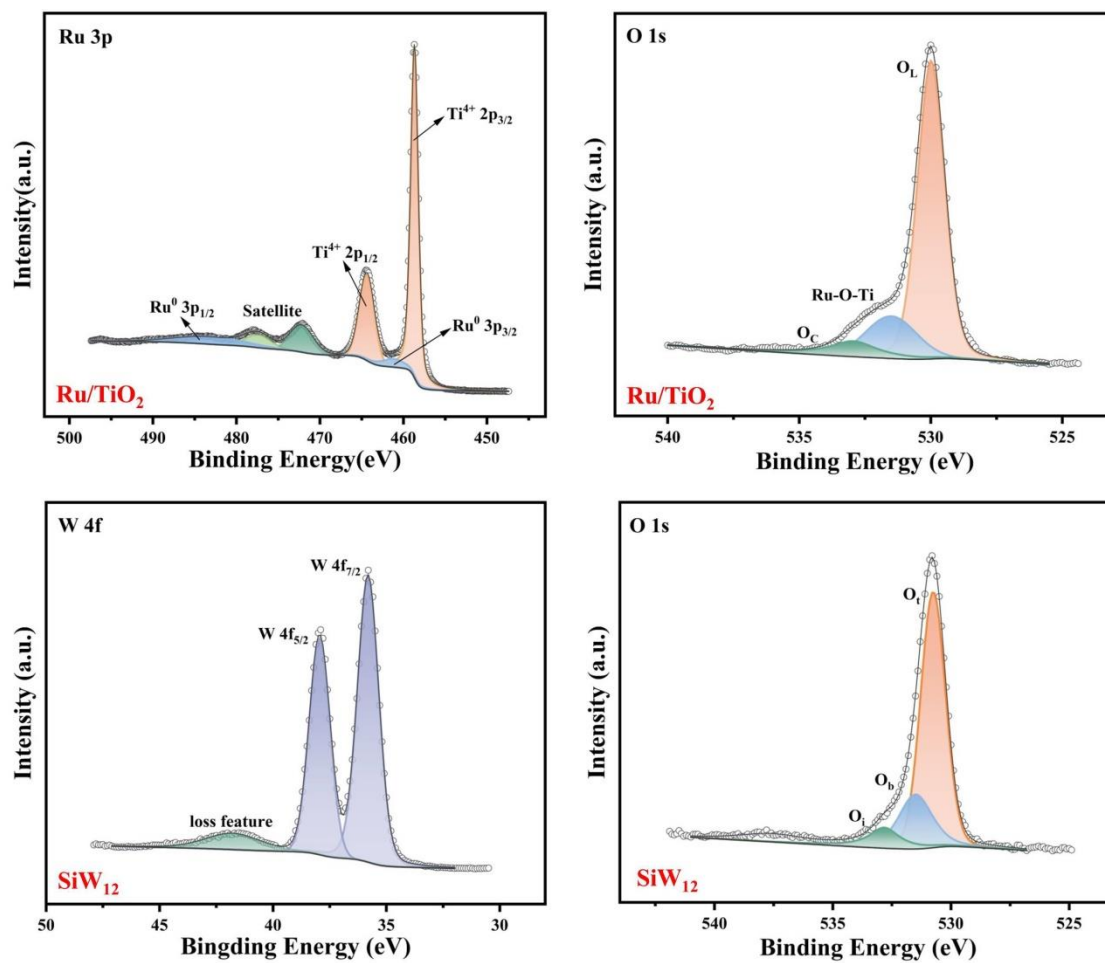

**Supplementary Fig.S37** XPS spectra of Ru/TiO<sub>2</sub> (Ru 3p and O 1s) and SiW<sub>12</sub> (W 4f and O 1s)

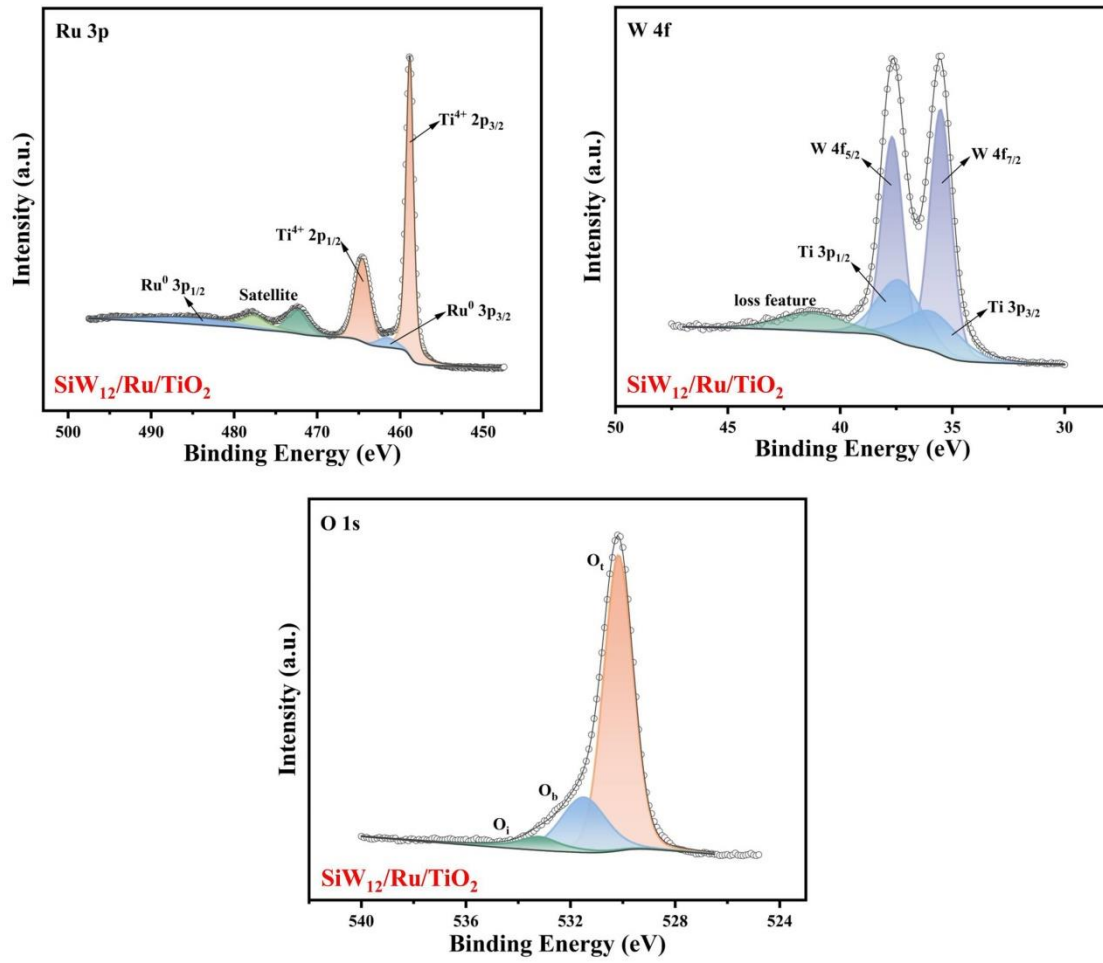

**Supplementary Fig.S38** XPS spectra of  $\text{SiW}_{12}$  adsorbed on  $\text{Ru}/\text{TiO}_2$  [ $\text{SiW}_{12}/\text{Ru}/\text{TiO}_2$ ]  
 (Ru 3p, W 4f and O 1s)]



## 6. Comparison of conventional electrolysis with our proposed routes

In conventional electrolysis, the catalysts particles were loaded on the electrode to realize the electrochemical hydrogenation of nitrogen into ammonia as shown in Supplementary Fig.S39. This kind of electrolysis system has some requirements and limits: (1) Catalysts need to be attached on the electrode using some binders, and the binders must be some substances that can conduct electricity. (2) The electrons coming from the electrode need to be transferred to the active sites on catalysts, so that the materials consisting of catalysts also need to conduct electricity. This could results in some limits in using many non-conductive materials that are very efficient to be as catalysts or supports. (3) The space for the catalyst particles is limited in the electrode in which the conductive binders also occupy a certain amount of space, so that the shapes and contact area of catalyst particles are limited as well. (4) The nitrogen  $N_2$  gas needed to overcome the diffusion barriers from the bulk electrolyte to reach at the active sites on catalyst particles loaded on electrode. This could limit the reaction rate of ammonia synthesis.

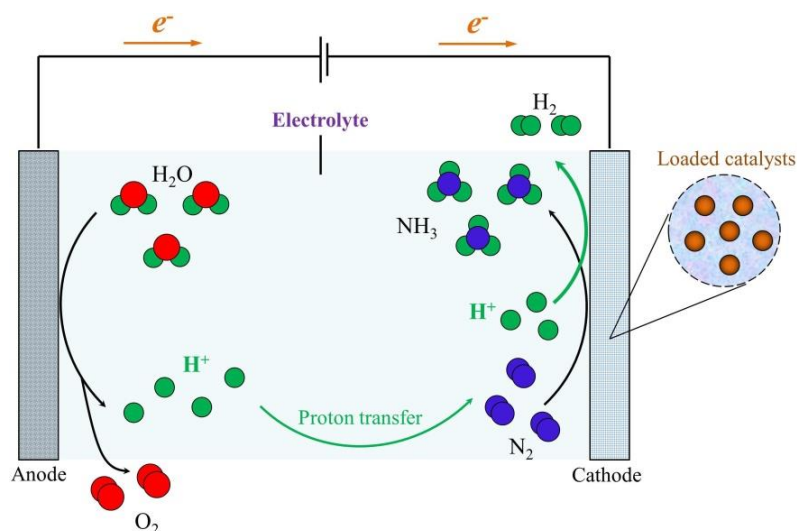

**Supplementary Fig.S39** The conventional catalyst-loaded electrochemical system for

nitrogen conversion into ammonia in reported works

However, in our work, a suspended electrolysis system was established to give a novel strategy that uses a combination of a suspended Ru catalyst and water-soluble polyoxometalate  $\text{SiW}_{12}$  as shown in Supplementary Fig.S40. The  $\text{SiW}_{12}$  adopted here has multiple functions: First, the electrons can be captured and stored by  $\text{SiW}_{12}$  which hinders the protons to further react with electrons. Second,  $\text{SiW}_{12}$  has a low electrical potential which can be easily reduced to negative voltage in water solution, which is essential for reducing target molecules of  $\text{N}_2$  with protons. Third, the reduced  $\text{SiW}_{12}$  can serve as a soluble electron transfer catalyst to transfer the electrons to the Ru catalysts where then the electrons are released to reduce the nitrogen into ammonia.

This suspended dual-catalyst system design could overcome the kinetic diffusion issue and transfer electrons from electrode to suppress hydrogen evolution, so that the electrochemical reaction rate and faradaic efficiency are greatly improved. Because the catalyst particles are not attached on the electrode, the electrons involved in the reactions are delivered by the electron transfer catalyst  $\text{SiW}_{12}$  rather than direct electric current flow through the catalyst particles. As a result, the required electric conductivity of catalyst particles is no longer limited in this study. This is impossible in conventional electrolysis system which strictly requires the electrons coming from the electrode. This kind of novel design is very different from the traditional ones and has giant significance because there are no limits in the range of catalyst designs and selection of various supports in the electrocatalytic hydrogenation. No matter what kinds of catalysts with different shapes, sizes, geometries, materials and conductive or

non-conductive, all can be used in this electron transfer catalyst enhanced electrolysis system. Even the homogeneous catalysts also can be used in this work, but cannot be used in the conventional ones due to the unique flow characteristics of homogeneous catalysts. In addition, the nitrogen hydrogenation reaction was transferred to occur on the suspended catalysts. This greatly leaves us more opportunities and operations to intensify the nitrogen fixation process, but not affect the electron transfer process on electrode.

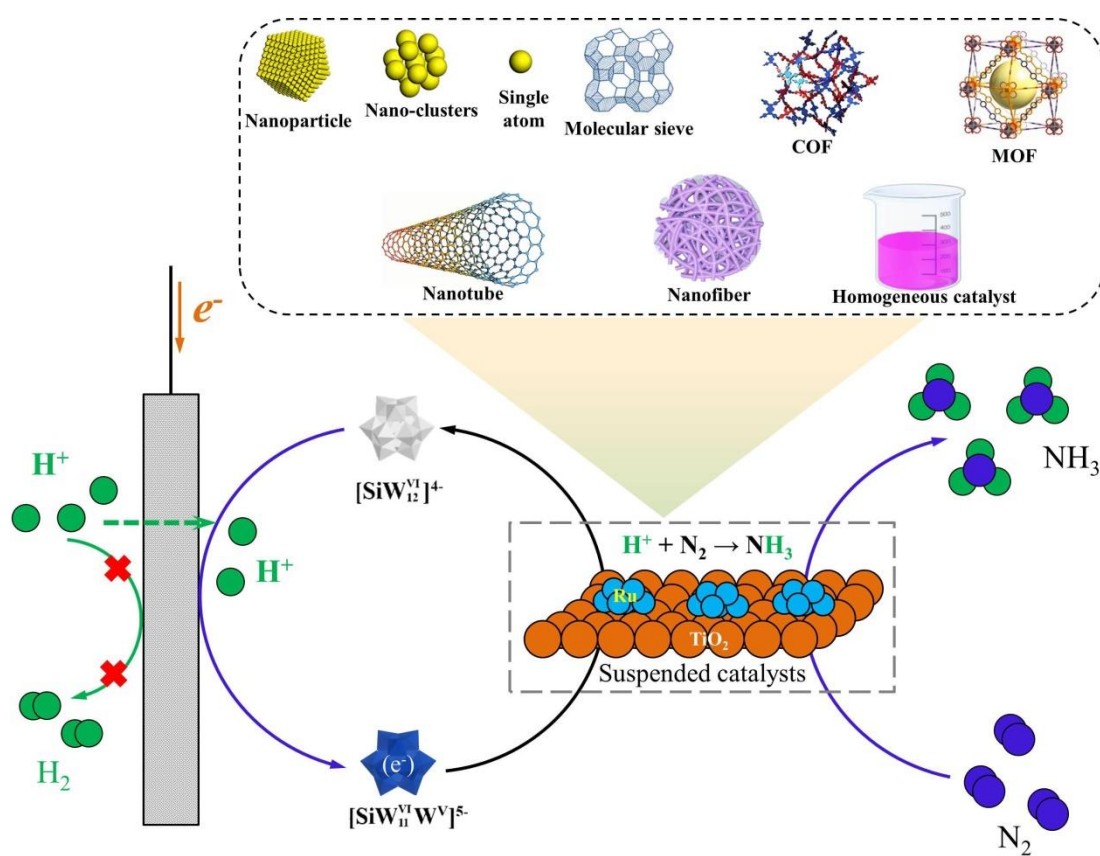

**Supplementary Fig.S40** The proposed suspended-catalyst electrochemical system for nitrogen conversion into ammonia in this work

## Appendix

### 1. Comparison of ammonia synthesis at constant current and constant potential

In order to compare, the electrolysis of ammonia synthesis at a constant current density ( $0.1 \text{ mA cm}^{-2}$ ) and a constant potential ( $-0.04 \text{ V vs NHE}$ ,  $0.1 \text{ mA cm}^{-2}$ ) is also conducted and the results are shown in Supplementary Fig.S41. It can be found that these two methods have similar results as long as the current density keeps same with each other. Therefore, in this work, the electrolysis at constant current density is chosen because it is very convenient to calculate the Faraday efficiency.

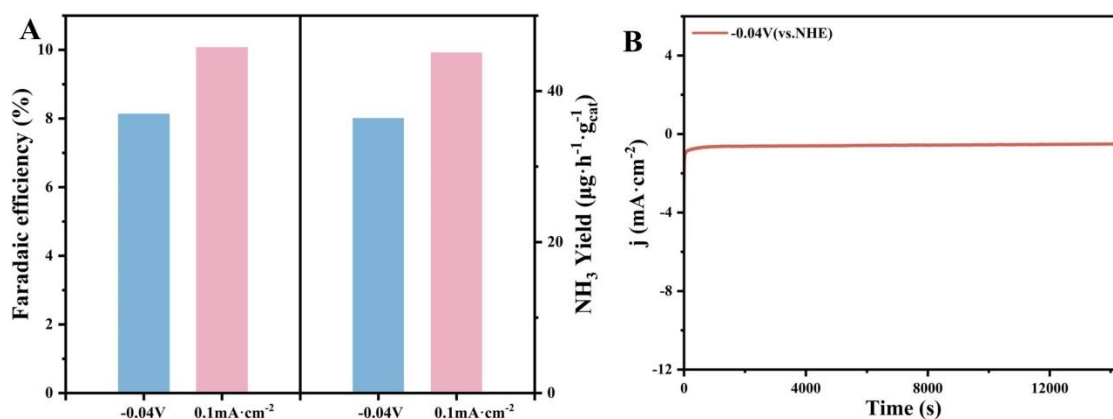

**Supplementary Fig.S41** Comparison of electrolysis of ammonia synthesis between constant current ( $0.1 \text{ mA}\cdot\text{cm}^{-2}$ ) and constant potential ( $-0.04 \text{ V vs NHE}$ ,  $0.1 \text{ mA}\cdot\text{cm}^{-2}$ ).

## 2. Experimental details and errors summarized in Table.A1

Table.A1 Summarized experimental results of electrocatalytic ammonia synthesis

| Experimental conditions                                                      | Current density (mA/cm <sup>2</sup> ) | FE (%)  |         |         | FE average (%) | Error (%) |
|------------------------------------------------------------------------------|---------------------------------------|---------|---------|---------|----------------|-----------|
|                                                                              |                                       | First   | Second  | Third   |                |           |
| 35mL water<br>5mM SiW <sub>12</sub><br>0.05g Ru/C                            | 100                                   | 0.00739 | 0.00712 | 0.00796 | 0.00749        | 1.34~6.27 |
|                                                                              | 10                                    | 0.0942  | 0.0894  | 0.102   | 0.0952         | 1.05~7.14 |
|                                                                              | 1                                     | 0.325   | 0.375   | 0.332   | 0.344          | 3.49~9.01 |
|                                                                              | 0.1                                   | 1.597   | 1.308   | 1.349   | 1.418          | 4.87~12.6 |
| 35mL water<br>5mM SiW <sub>12</sub><br>0.05g Rh/C                            | 100                                   | —       | —       | —       | —              |           |
|                                                                              | 10                                    | —       | —       | —       | —              |           |
|                                                                              | 1                                     | —       | —       | —       | —              |           |
|                                                                              | 0.1                                   | —       | —       | —       | —              |           |
| 35mL water<br>5mM SiW <sub>12</sub><br>0.05g Pd/C                            | 100                                   | 0.00129 | 0.00137 | 0.00156 | 0.00142        | 3.52~9.86 |
|                                                                              | 10                                    | —       | —       | —       | —              |           |
|                                                                              | 1                                     | —       | —       | —       | —              |           |
|                                                                              | 0.1                                   | —       | —       | —       | —              |           |
| 35mL water<br>5mM SiW <sub>12</sub><br>0.05g Pt/C                            | 100                                   | —       | —       | —       | —              |           |
|                                                                              | 10                                    | —       | —       | —       | —              |           |
|                                                                              | 1                                     | —       | —       | —       | —              |           |
|                                                                              | 0.1                                   | —       | —       | —       | —              |           |
| 35mL water<br>5mM SiW <sub>12</sub><br>0.05g Ru/TiO <sub>2</sub>             | 100                                   | 0.0475  | 0.0485  | 0.0531  | 0.0497         | 2.41~6.84 |
|                                                                              | 10                                    | 0.248   | 0.286   | 0.273   | 0.269          | 1.49~7.81 |
|                                                                              | 1                                     | 1.775   | 2.056   | 2.031   | 1.954          | 3.94~9.16 |
|                                                                              | 0.1                                   | 11.32   | 9.57    | 9.32    | 10.07          | 4.97~12.4 |
| 35mL water<br>H <sub>3</sub> PO <sub>4</sub><br>0.05g Ru/TiO <sub>2</sub>    | 100                                   | 0.00857 | 0.00928 | 0.0096  | 0.00915        | 1.42~6.77 |
|                                                                              | 10                                    | 0.0562  | 0.0645  | 0.0623  | 0.0610         | 2.13~7.87 |
|                                                                              | 1                                     | 0.557   | 0.609   | 0.532   | 0.585          | 4.1~9.06  |
|                                                                              | 0.1                                   | 3.74    | 3.82    | 3.12    | 3.56           | 5.06~12.4 |
| 35mL water<br>CF <sub>3</sub> SO <sub>3</sub> H<br>0.05g Ru/TiO <sub>2</sub> | 100                                   | 0.0167  | 0.0181  | 0.0162  | 0.0170         | 1.76~6.47 |
|                                                                              | 10                                    | 0.138   | 0.159   | 0.144   | 0.147          | 2.04~7.48 |
|                                                                              | 1                                     | 0.92    | 1.08    | 1.051   | 1.017          | 3.34~9.54 |

|  |                           |     |        |        |        |        |           |
|--|---------------------------|-----|--------|--------|--------|--------|-----------|
|  |                           | 0.1 | 10.43  | 9.57   | 9.76   | 9.92   | 1.61~5.14 |
|  |                           | 100 | 0.198  | 0.178  | 0.185  | 0.187  | 1.07~5.89 |
|  | 35mL water                | 10  | —      | —      | —      | —      |           |
|  | 5mM SiW <sub>12</sub>     | 1   | —      | —      | —      | —      |           |
|  | 0.05g TiO <sub>2</sub>    | 0.1 | —      | —      | —      | —      |           |
|  | pH=1                      | 100 | 0.0504 | 0.0478 | 0.0512 | 0.0498 | 1.2~4.02  |
|  | pH=3                      | 100 | 0.0298 | 0.0318 | 0.0323 | 0.0313 | 1.6~4.79  |
|  | pH=5                      | 100 | 0.0279 | 0.0261 | 0.0285 | 0.0275 | 1.45~5.09 |
|  | pH=7                      | 100 | 0.0158 | 0.0155 | 0.0146 | 0.0153 | 1.31~4.58 |
|  | pH=9                      | 100 | 0.0125 | 0.0137 | 0.0134 | 0.0132 | 1.52~5.3  |
|  | Methanol                  | 100 | 1.093  | 1.002  | 1.124  | 1.073  | 1.86~6.62 |
|  | Ethanol                   | 100 | 3.507  | 3.779  | 3.898  | 3.728  | 1.37~5.93 |
|  | <i>n</i> -propanol        | 100 | 1.564  | 1.69   | 1.756  | 1.67   | 1.52~6.35 |
|  | Isopropanol               | 100 | —      | —      | —      | —      |           |
|  |                           | 100 | 3.507  | 3.779  | 3.898  | 3.728  | 1.37~5.93 |
|  | 3mL ethanol               | 10  | 5.073  | 5.551  | 5.765  | 5.463  | 1.61~7.12 |
|  | 32mL water                | 1   | 6.081  | 5.403  | 6.282  | 5.922  | 2.69~8.76 |
|  | 5mM SiW <sub>12</sub>     | 0.1 | 38.82  | 43.77  | 46.2   | 42.93  | 1.96~9.57 |
|  | 0.05g Ru/TiO <sub>2</sub> |     |        |        |        |        |           |

\*— means undetected

## References

- [1] B. Yu, H. Li, J. White, S. Donne, J. Yi, S. Xi, Y. Fu, G. Henkelman, H. Yu, Z. Chen, T. Ma, Tuning the Catalytic Preference of Ruthenium Catalysts for Nitrogen Reduction by Atomic Dispersion, *Adv. Funct. Mater.* 30 (2020) 1905665.  
<https://doi.org/https://doi.org/10.1002/adfm.201905665>.
- [2] H. Tao, C. Choi, L.-X. Ding, Z. Jiang, Z. Han, M. Jia, Q. Fan, Y. Gao, H. Wang, A.W. Robertson, S. Hong, Y. Jung, S. Liu, Z. Sun, Nitrogen Fixation by Ru Single-Atom Electrocatalytic Reduction, *Chem.* 5 (2019) 204–214.  
<https://doi.org/https://doi.org/10.1016/j.chempr.2018.10.007>.
- [3] Z. Geng, Y. Liu, X. Kong, P. Li, K. Li, Z. Liu, J. Du, M. Shu, R. Si, J. Zeng, Achieving a Record-High Yield Rate of 120.9 for N<sub>2</sub> Electrochemical Reduction over Ru Single-Atom Catalysts, *Adv. Mater.* 30 (2018) 1803498.  
<https://doi.org/https://doi.org/10.1002/adma.201803498>.
- [4] W. Peng, M. Luo, X. Xu, K. Jiang, M. Peng, D. Chen, T.-S. Chan, Y. Tan, Spontaneous Atomic Ruthenium Doping in Mo<sub>2</sub>CTX MXene Defects Enhances Electrocatalytic Activity for the Nitrogen Reduction Reaction, *Adv. Energy Mater.* 10 (2020) 2001364.  
<https://doi.org/https://doi.org/10.1002/aenm.202001364>.
- [5] R. Zhao, C. Liu, X. Zhang, X. Zhu, P. Wei, L. Ji, Y. Guo, S. Gao, Y. Luo, Z. Wang, X. Sun, An ultrasmall Ru<sub>2</sub>P nanoparticles–reduced graphene oxide hybrid: an efficient electrocatalyst for NH<sub>3</sub> synthesis under ambient conditions, *J. Mater. Chem. A.* 8 (2020) 77–81.  
<https://doi.org/10.1039/C9TA10346E>.
- [6] X. Wang, W. Wang, M. Qiao, G. Wu, W. Chen, T. Yuan, Q. Xu, M. Chen, Y. Zhang, X. Wang,

- J. Wang, J. Ge, X. Hong, Y. Li, Y. Wu, Y. Li, Atomically dispersed Au<sub>1</sub> catalyst towards efficient electrochemical synthesis of ammonia, *Sci. Bull.* 63 (2018) 1246–1253.  
<https://doi.org/https://doi.org/10.1016/j.scib.2018.07.005>.
- [7] C. He, Z.-Y. Wu, L. Zhao, M. Ming, Y. Zhang, Y. Yi, J.-S. Hu, Identification of FeN<sub>4</sub> as an Efficient Active Site for Electrochemical N<sub>2</sub> Reduction, *ACS Catal.* 9 (2019) 7311–7317.  
<https://doi.org/10.1021/acscatal.9b00959>.
- [8] Y. Wang, X. Cui, J. Zhao, G. Jia, L. Gu, Q. Zhang, L. Meng, Z. Shi, L. Zheng, C. Wang, Z. Zhang, W. Zheng, Rational Design of Fe–N/C Hybrid for Enhanced Nitrogen Reduction Electrocatalysis under Ambient Conditions in Aqueous Solution, *ACS Catal.* 9 (2019) 336–344.  
<https://doi.org/10.1021/acscatal.8b03802>.
- [9] M. Wang, S. Liu, T. Qian, J. Liu, J. Zhou, H. Ji, J. Xiong, J. Zhong, C. Yan, Over 56.55% Faradaic efficiency of ambient ammonia synthesis enabled by positively shifting the reaction potential, *Nat. Commun.* 10 (2019) 341. <https://doi.org/10.1038/s41467-018-08120-x>.
- [10] S.-J. Li, D. Bao, M.-M. Shi, B.-R. Wulan, J.-M. Yan, Q. Jiang, Amorphizing of Au Nanoparticles by CeO<sub>x</sub>–RGO Hybrid Support towards Highly Efficient Electrocatalyst for N<sub>2</sub> Reduction under Ambient Conditions, *Adv. Mater.* 29 (2017) 1700001.  
<https://doi.org/https://doi.org/10.1002/adma.201700001>.
- [11] M.-M. Shi, D. Bao, B.-R. Wulan, Y.-H. Li, Y.-F. Zhang, J.-M. Yan, Q. Jiang, Au Sub-Nanoclusters on TiO<sub>2</sub> toward Highly Efficient and Selective Electrocatalyst for N<sub>2</sub> Conversion to NH<sub>3</sub> at Ambient Conditions, *Adv. Mater.* 29 (2017) 1606550.  
<https://doi.org/https://doi.org/10.1002/adma.201606550>.
- [12] G.-F. Chen, X. Cao, S. Wu, X. Zeng, L.-X. Ding, M. Zhu, H. Wang, Ammonia



- Electrosynthesis with High Selectivity under Ambient Conditions via a Li<sup>+</sup> Incorporation Strategy, *J. Am. Chem. Soc.* 139 (2017) 9771–9774. <https://doi.org/10.1021/jacs.7b04393>.
- [13] Y. Liu, Y. Su, X. Quan, X. Fan, S. Chen, H. Yu, H. Zhao, Y. Zhang, J. Zhao, Facile Ammonia Synthesis from Electrocatalytic N<sub>2</sub> Reduction under Ambient Conditions on N-Doped Porous Carbon, *ACS Catal.* 8 (2018) 1186–1191. <https://doi.org/10.1021/acscatal.7b02165>.
- [14] E. Vasileiou, V. Kyriakou, I. Garagounis, A. Vourros, M. Stoukides, Ammonia synthesis at atmospheric pressure in a BaCe<sub>0.2</sub>Zr<sub>0.7</sub>Y<sub>0.1</sub>O<sub>2.9</sub> solid electrolyte cell, *Solid State Ionics.* 275 (2015) 110–116. <https://doi.org/https://doi.org/10.1016/j.ssi.2015.01.002>.
- [15] F. Zhang, Q. Yang, B. Pan, R. Xu, H. Wang, G. Ma, Proton conduction in La<sub>0.9</sub>Sr<sub>0.1</sub>Ga<sub>0.8</sub>Mg<sub>0.2</sub>O<sub>3-α</sub> ceramic prepared via microemulsion method and its application in ammonia synthesis at atmospheric pressure, *Mater. Lett.* 61 (2007) 4144–4148. <https://doi.org/https://doi.org/10.1016/j.matlet.2007.01.060>.
- [16] D.S. Yun, J.H. Joo, J.H. Yu, H.C. Yoon, J.-N. Kim, C.-Y. Yoo, Electrochemical ammonia synthesis from steam and nitrogen using proton conducting yttrium doped barium zirconate electrolyte with silver, platinum, and lanthanum strontium cobalt ferrite electrocatalyst, *J. Power Sources.* 284 (2015) 245–251. <https://doi.org/https://doi.org/10.1016/j.jpowsour.2015.03.002>.
- [17] J. Otomo, N. Noda, F. Kosaka, Electrochemical Synthesis of Ammonia with Proton Conducting Solid Electrolyte Fuel Cells at Intermediate Temperatures, *ECS Trans.* 68 (2015) 2663. <https://doi.org/10.1149/06801.2663ecst>.
- [18] Y. Guo, B. Liu, Q. Yang, C. Chen, W. Wang, G. Ma, Preparation via microemulsion method and proton conduction at intermediate-temperature of BaCe<sub>1-x</sub>Y<sub>x</sub>O<sub>3-α</sub>, *Electrochem.*

- Commun. 11 (2009) 153–156. <https://doi.org/https://doi.org/10.1016/j.elecom.2008.10.038>.
- [19] I.A. Amar, C.T.G. Petit, L. Zhang, R. Lan, P.J. Skabara, S. Tao, Electrochemical synthesis of ammonia based on doped-ceria-carbonate composite electrolyte and perovskite cathode, *Solid State Ionics*. 201 (2011) 94–100. <https://doi.org/https://doi.org/10.1016/j.ssi.2011.08.003>.
- [20] I.A. Amar, R. Lan, C.T.G. Petit, S. Tao, Electrochemical Synthesis of Ammonia Based on  $\text{Co}_3\text{Mo}_3\text{N}$  Catalyst and  $\text{LiAlO}_2\text{-(Li,Na,K)}_2\text{CO}_3$  Composite Electrolyte, *Electrocatalysis*. 6 (2015) 286–294. <https://doi.org/10.1007/s12678-014-0242-x>.
- [21] I.A. Amar, R. Lan, C.T.G. Petit, V. Arrighi, S. Tao, Electrochemical synthesis of ammonia based on a carbonate-oxide composite electrolyte, *Solid State Ionics*. 182 (2011) 133–138. <https://doi.org/https://doi.org/10.1016/j.ssi.2010.11.009>.
- [22] I.A. Amar, R. Lan, S. Tao, Electrochemical Synthesis of Ammonia Directly from Wet  $\text{N}_2$  Using  $\text{La}_{0.6}\text{Sr}_{0.4}\text{Fe}_{0.8}\text{Cu}_{0.2}\text{O}_{3-\delta}\text{-Ce}_{0.8}\text{Gd}_{0.18}\text{Ca}_{0.02}\text{O}_{2-\delta}$  Composite Catalyst, *J. Electrochem. Soc.* 161 (2014) H350. <https://doi.org/10.1149/2.021406jes>.
- [23] T. Murakami, T. Nohira, Y. Araki, T. Goto, R. Hagiwara, Y.H. Ogata, Electrolytic Synthesis of Ammonia from Water and Nitrogen under Atmospheric Pressure Using a Boron-Doped Diamond Electrode as a Nonconsumable Anode, *Electrochem. Solid-State Lett.* 10 (2007) E4. <https://doi.org/10.1149/1.2437674>.
- [24] T. Murakami, T. Nohira, T. Goto, Y.H. Ogata, Y. Ito, Electrolytic ammonia synthesis from water and nitrogen gas in molten salt under atmospheric pressure, *Electrochim. Acta*. 50 (2005) 5423–5426. <https://doi.org/https://doi.org/10.1016/j.electacta.2005.03.023>.
- [25] S. Licht, B. Cui, B. Wang, F.-F. Li, J. Lau, S. Liu, RETRACTED: Ammonia synthesis by  $\text{N}_2$  and steam electrolysis in molten hydroxide suspensions of nanoscale  $\text{Fe}_2\text{O}_3$ , *Science* (80-. ).

- 345 (2014) 637–640. <https://doi.org/10.1126/science.1254234>.
- [26] F.-F. Li, S. Licht, Advances in Understanding the Mechanism and Improved Stability of the Synthesis of Ammonia from Air and Water in Hydroxide Suspensions of Nanoscale Fe<sub>2</sub>O<sub>3</sub>, *Inorg. Chem.* 53 (2014) 10042–10044. <https://doi.org/10.1021/ic5020048>.
- [27] V. Kordali, G. Kyriacou, C. Lambrou, Electrochemical synthesis of ammonia at atmospheric pressure and low temperature in a solid polymer electrolyte cell, *Chem. Commun.* (2000) 1673–1674. <https://doi.org/10.1039/B004885M>.
- [28] R. Lan, S. Tao, Electrochemical synthesis of ammonia directly from air and water using a Li<sup>+</sup>/H<sup>+</sup>/NH<sub>4</sub><sup>+</sup> mixed conducting electrolyte, *RSC Adv.* 3 (2013) 18016–18021. <https://doi.org/10.1039/C3RA43432J>.
- [29] M. Kitano, S. Kanbara, Y. Inoue, N. Kuganathan, P. V Sushko, T. Yokoyama, M. Hara, H. Hosono, Electride support boosts nitrogen dissociation over ruthenium catalyst and shifts the bottleneck in ammonia synthesis, *Nat. Commun.* 6 (2015) 6731–9. <https://doi.org/10.1038/ncomms7731>.
- [30] M. Kitano, Y. Inoue, Y. Yamazaki, F. Hayashi, S. Kanbara, S. Matsuishi, T. Yokoyama, S.-W. Kim, M. Hara, H. Hosono, Ammonia synthesis using a stable electride as an electron donor and reversible hydrogen store, *Nat. Chem.* 4 (2012) 934–940. <https://doi.org/10.1038/nchem.1476>.
- [31] Y. Inoue, M. Kitano, S.-W. Kim, T. Yokoyama, M. Hara, H. Hosono, Highly dispersed Ru on electride [Ca<sub>24</sub>Al<sub>28</sub>O<sub>64</sub>]<sup>4+</sup>(e<sup>-</sup>)<sub>4</sub> as a catalyst for ammonia synthesis, *ACS Catal.* 4 (2014) 674–680. <https://doi.org/10.1021/cs401044a>.
- [32] M. Kitano, Y. Inoue, H. Ishikawa, K. Yamagata, T. Nakao, T. Tada, S. Matsuishi, T. Yokoyama, M. Hara, H. Hosono, Essential role of hydride ion in ruthenium-based ammonia

- synthesis catalysts, *Chem. Sci.* 7 (2016) 4036–4043. <https://doi.org/10.1039/C6SC00767H>.
- [33] M. Hattori, T. Mori, T. Arai, Y. Inoue, M. Sasase, T. Tada, M. Kitano, T. Yokoyama, M. Hara, H. Hosono, Enhanced catalytic ammonia synthesis with transformed BaO, *ACS Catal.* 8 (2018) 10977–10984. <https://doi.org/10.1021/acscatal.8b02839>.
- [34] Y. Lu, J. Li, T. Tada, Y. Toda, S. Ueda, T. Yokoyama, M. Kitano, H. Hosono, Water durable electride Y<sub>5</sub>Si<sub>3</sub>: electronic structure and catalytic activity for ammonia synthesis, *J. Am. Chem. Soc.* 138 (2016) 3970–3973. <https://doi.org/10.1021/jacs.6b00124>.
- [35] J. Wu, Y. Gong, T. Inoshita, D.C. Fredrickson, J. Wang, Y. Lu, M. Kitano, H. Hosono, Tiered electron anions in multiple voids of LaScSi and their applications to ammonia synthesis, *Adv. Mater.* 29 (2017) 1700924. <https://doi.org/https://doi.org/10.1002/adma.201700924>.
- [36] Y. Inoue, M. Kitano, M. Tokunari, T. Taniguchi, K. Ooya, H. Abe, Y. Niwa, M. Sasase, M. Hara, H. Hosono, Direct activation of cobalt catalyst by 12CaO·7Al<sub>2</sub>O<sub>3</sub> electride for ammonia synthesis, *ACS Catal.* 9 (2019) 1670–1679. <https://doi.org/10.1021/acscatal.8b03650>.
- [37] R. Kojima, K. Aika, Cobalt molybdenum bimetallic nitride catalysts for ammonia synthesis: Part 2. Kinetic study, *Appl. Catal. A Gen.* 218 (2001) 121–128. [https://doi.org/https://doi.org/10.1016/S0926-860X\(01\)00626-3](https://doi.org/https://doi.org/10.1016/S0926-860X(01)00626-3).
- [38] M. Hattori, S. Iijima, T. Nakao, H. Hosono, M. Hara, Solid solution for catalytic ammonia synthesis from nitrogen and hydrogen gases at 50 °C, *Nat. Commun.* 11 (2020) 2001. <https://doi.org/10.1038/s41467-020-15868-8>.
- [39] T. Bécue, R.J. Davis, J.M. Garces, Effect of cationic promoters on the kinetics of ammonia synthesis catalyzed by ruthenium supported on zeolite X, *J. Catal.* 179 (1998) 129–137. <https://doi.org/https://doi.org/10.1006/jcat.1998.2212>.

- [40] S. Hagen, R. Barfod, R. Fehrmann, C.J.H. Jacobsen, H.T. Teunissen, I. Chorkendorff, Ammonia synthesis with barium-promoted iron–cobalt alloys supported on carbon, *J. Catal.* 214 (2003) 327–335. [https://doi.org/https://doi.org/10.1016/S0021-9517\(02\)00182-3](https://doi.org/https://doi.org/10.1016/S0021-9517(02)00182-3).
- [41] P. Wang, F. Chang, W. Gao, J. Guo, G. Wu, T. He, P. Chen, Breaking scaling relations to achieve low-temperature ammonia synthesis through LiH-mediated nitrogen transfer and hydrogenation, *Nat. Chem.* 9 (2017) 64–70. <https://doi.org/10.1038/nchem.2595>.
- [42] B. Keita, L. Nadjo, New aspects of the electrochemistry of heteropolyacids: Part II. Coupled electron and proton transfers in the reduction of silicungstic species, *J. Electroanal. Chem. Interfacial Electrochem.* 217 (1987) 287–304. [https://doi.org/https://doi.org/10.1016/0022-0728\(87\)80225-5](https://doi.org/https://doi.org/10.1016/0022-0728(87)80225-5).
- [43] Y. Guo, R. Zhang, S. Zhang, Y. Zhao, Q. Yang, Z. Huang, B. Dong, C. Zhi, Pd doping-weakened intermediate adsorption to promote electrocatalytic nitrate reduction on TiO<sub>2</sub> nanoarrays for ammonia production and energy supply with zinc–nitrate batteries, *Energy Environ. Sci.* 14 (2021) 3938–3944. <https://doi.org/10.1039/D1EE00806D>.
- [44] X. Zeng, Y. Bai, S.M. Choi, L. Tong, R.M. Aleisa, Z. Li, X. Liu, R. Yu, N. V Myung, Y. Yin, Mesoporous TiO<sub>2</sub> nanospheres loaded with highly dispersed Pd nanoparticles for pH-universal hydrogen evolution reaction, *Mater. Today Nano.* 6 (2019) 100038. <https://doi.org/https://doi.org/10.1016/j.mtnano.2019.100038>.
- [45] H. Ye, Q. Wang, M. Catalano, N. Lu, J. Vermeylen, M.J. Kim, Y. Liu, Y. Sun, X. Xia, Ru Nanoframes with an fcc Structure and Enhanced Catalytic Properties, *Nano Lett.* 16 (2016) 2812–2817. <https://doi.org/10.1021/acs.nanolett.6b00607>.
- [46] N. Kruse, S. Chenakin, XPS characterization of Au/TiO<sub>2</sub> catalysts: Binding energy assessment

- and irradiation effects, *Appl. Catal. A Gen.* 391 (2011) 367–376.  
<https://doi.org/https://doi.org/10.1016/j.apcata.2010.05.039>.
- [47] R. Castillo, B. Koch, P. Ruiz, B. Delmon, Influence of the Amount of Titania on the Texture and Structure of Titania Supported on Silica, *J. Catal.* 161 (1996) 524–529.  
<https://doi.org/https://doi.org/10.1006/jcat.1996.0214>.
- [48] M. Wang, G. Li, S. Wang, X. Liu, A. Wang, H. Cao, C. Zhang, Catalytic oxidation of propane over nanorod-like TiO<sub>2</sub> supported Ru catalysts: Structure-activity dependence and mechanistic insights, *Chem. Eng. J.* 481 (2024) 148344.  
<https://doi.org/https://doi.org/10.1016/j.cej.2023.148344>.
- [49] L. Jing, G. Jie, W. Yu, H. Ren, X. Cui, X. Chen, L. Jiang, A unique sandwich-structured Ru-TiO/TiO<sub>2</sub>@NC as an efficient bi-functional catalyst for hydrogen oxidation and hydrogen evolution reactions, *Chem. Eng. J.* 472 (2023) 145009.  
<https://doi.org/https://doi.org/10.1016/j.cej.2023.145009>.
- [50] R. Bavand, A. Yelon, E. Sacher, X-ray photoelectron spectroscopic and morphologic studies of Ru nanoparticles deposited onto highly oriented pyrolytic graphite, *Appl. Surf. Sci.* 355 (2015) 279–289. <https://doi.org/https://doi.org/10.1016/j.apsusc.2015.06.202>.
- [51] W. Cai, Y.-F. Jiang, J. Zhang, H. Yang, J. Zhang, C.-Q. Xu, W. Liu, J. Li, B. Liu, Ruthenium/titanium oxide interface promoted electrochemical nitrogen reduction reaction, *Chem Catal.* 2 (2022) 1764–1774. <https://doi.org/10.1016/j.checat.2022.05.009>.
